# Supplementary material for: Variant-specific symptoms of COVID-19 in a study of 1,542,510 adults in England
Source: Springer Nature journal article supplement (doi:10.1038/s41467-022-34244-2), 2022-11-11
Supplement: 41467_2022_34244_MOESM1_ESM.pdf [file 41467_2022_34244_MOESM1_ESM.pdf]

# **Variant-specific symptoms of COVID-19 in a study of 1,542,510 adults in England: Supplementary material**

Matthew Whitaker, Joshua Elliott, Barbara Bodinier, Wendy Barclay, Helen Ward, Graham Cooke, Christl A. Donnelly, Marc Chadeau-Hyam, Paul Elliott

## Supplementary tables

**Supplementary Table 1** Characteristics of the study population.

**Supplementary Table 2** Characteristics of swab positives in the study population.

**Supplementary Table 3** Odds ratios for swab positivity based on presence or absence of any of 26 symptoms surveyed across selected rounds of REACT-1.

**Supplementary Table 4** Unadjusted odds ratios for swab positivity based on presence or absence of any of 26 symptoms surveyed across selected rounds of REACT-1

**Supplementary Table 5** Results from log-linear regression of symptom count as a function of multiple covariates.

## Supplementary figures

**Supplementary Figure 1** Comparison of Ct values in swab-positive respondents with Omicron BA.1 and BA.2 variants in REACT-1 rounds 17–19, stratified by symptom status (presence of any of 26 surveyed symptoms).

**Supplementary Figure 2** Plot showing the odds ratios and 95% confidence intervals for symptoms in a pooled analysis of N=1,542,510 participants across five variant-phases.

**Supplementary Figure 3** Results of LASSO stability selection with swab positive/negative as the binary outcome variable and each of 26 symptoms as predictors, in five phases of REACT-1 corresponding to periods of dominance of five SARS-CoV-2 variants in England.

**Supplementary Figure 4** Heatmaps showing co-occurrence of symptoms across variants among swab-positive individuals.

**Supplementary Figure 5** Heatmap showing co-occurrence of first symptoms among swab positive individuals in rounds 17–19, when Omicron was dominant.

**Supplementary Figure 6** Scatter plot showing N-gene Ct values among symptomatic swab-positive individuals plotted against time (in days) since symptom onset, by BA.1/BA.2.

**Supplementary Figure 7** Panel plot showing time since symptom onset across different variant phases

**Supplementary Figure 8** Panel plot exploring Ct values and PCR positivity rates among those who were excluded from analysis owing to missing symptom data.

**Supplementary Figure 9** Prevalence of any of 26 symptoms in PCR negative vs PCR positive individuals in each round of REACT-1 between June 2020 and March 2022.

## Supplementary methods

**Survey symptom questions**

**Data exclusions**

**Model specifications**

**Assessing model performance in variable selection**

**Supplementary Table 1** Characteristics of study population. N (percent [95% CI]) or mean (SD).

| Variable                       | Category                               | Rounds 2-7 (Wild-type)       | Rounds 8-10 (Alpha)          | Rounds 13-15 (Delta)         | Rounds 17-19 (Omicron)       | Sum or mean(SD) |
|--------------------------------|----------------------------------------|------------------------------|------------------------------|------------------------------|------------------------------|-----------------|
| All participants               | All participants                       | 713,202 (100%, [100-100])    | 357,960 (100%, [100-100])    | 228,934 (100%, [100-100])    | 242,414 (100%, [100-100])    | 1,542,510       |
| Sex                            | Female                                 | 402,121 (56.4%, [56.3-56.5]) | 201,126 (56.2%, [56-56.3])   | 129,652 (56.6%, [56.4-56.8]) | 139,341 (57.5%, [57.3-57.7]) | 872,240         |
|                                | Male                                   | 311,081 (43.6%, [43.5-43.7]) | 156,834 (43.8%, [43.7-44])   | 99,282 (43.4%, [43.2-43.6])  | 103,073 (42.5%, [42.3-42.7]) | 670,270         |
| Age group                      | 18-24                                  | 32,298 (4.5%, [4.5-4.6])     | 15,805 (4.4%, [4.3-4.5])     | 7,268 (3.2%, [3.1-3.2])      | 15,662 (6.5%, [6.4-6.6])     | 71,033          |
|                                | 25-34                                  | 73,352 (10.3%, [10.2-10.4])  | 35,260 (9.9%, [9.8-9.9])     | 19,691 (8.6%, [8.5-8.7])     | 34,242 (14.1%, [14-14.3])    | 162,545         |
|                                | 35-44                                  | 103,317 (14.5%, [14.4-14.6]) | 51,269 (14.3%, [14.2-14.4])  | 30,996 (13.5%, [13.4-13.7])  | 37,425 (15.4%, [15.3-15.6])  | 223,007         |
|                                | 45-54                                  | 137,175 (19.2%, [19.1-19.3]) | 68,057 (19%, [18.9-19.1])    | 43,205 (18.9%, [18.7-19])    | 37,937 (15.6%, [15.5-15.8])  | 286,374         |
|                                | 55-64                                  | 157,180 (22%, [21.9-22.1])   | 80,550 (22.5%, [22.4-22.6])  | 53,663 (23.4%, [23.3-23.6])  | 48,896 (20.2%, [20-20.3])    | 340,289         |
|                                | 65-74                                  | 144,612 (20.3%, [20.2-20.4]) | 74,535 (20.8%, [20.7-21])    | 50,980 (22.3%, [22.1-22.4])  | 45,876 (18.9%, [18.8-19.1])  | 316,003         |
|                                | 75+                                    | 65,268 (9.2%, [9.1-9.2])     | 32,484 (9.1%, [9-9.2])       | 23,131 (10.1%, [10-10.2])    | 22,376 (9.2%, [9.1-9.3])     | 143,259         |
| Ethnicity                      | Asian                                  | 25,317 (3.6%, [3.6-3.6])     | 11,665 (3.3%, [3.3-3.4])     | 10,202 (4.6%, [4.5-4.6])     | 13,192 (5.6%, [5.5-5.7])     | 60,376          |
|                                | Black                                  | 6,736 (1%, [0.9-1])          | 3,497 (1%, [1-1])            | 3,441 (1.5%, [1.5-1.6])      | 3,820 (1.6%, [1.6-1.7])      | 17,494          |
|                                | Mixed                                  | 8,206 (1.2%, [1.1-1.2])      | 4,141 (1.2%, [1.1-1.2])      | 2,886 (1.3%, [1.2-1.3])      | 3,554 (1.5%, [1.5-1.6])      | 18,787          |
|                                | Other                                  | 5,066 (0.7%, [0.7-0.7])      | 2,382 (0.7%, [0.7-0.7])      | 2,082 (0.9%, [0.9-1])        | 2,232 (0.9%, [0.9-1])        | 11,762          |
|                                | White                                  | 658,752 (93.6%, [93.5-93.6]) | 330,027 (93.8%, [93.8-93.9]) | 205,368 (91.7%, [91.6-91.8]) | 213,938 (90.4%, [90.3-90.5]) | 1,408,085       |
| PCR positive at time of survey | No                                     | 710,231 (99.6%, [99.6-99.6]) | 355,685 (99.4%, [99.3-99.4]) | 227,441 (99.3%, [99.3-99.4]) | 231,705 (95.6%, [95.5-95.7]) | 1,525,062       |
|                                | Yes                                    | 2,971 (0.4%, [0.4-0.4])      | 2,275 (0.6%, [0.6-0.7])      | 1,493 (0.7%, [0.6-0.7])      | 10,709 (4.4%, [4.3-4.5])     | 17,448          |
| Prior COVID-19                 | No previous COVID-19                   | 604,198 (84.7%, [84.6-84.8]) | 301,856 (84.3%, [84.2-84.4]) | 189,854 (82.9%, [82.8-83.1]) | 165,113 (68.1%, [67.9-68.3]) | 1,261,021       |
|                                | Previous COVID-19 greater than 28 days | 3,308 (0.5%, [0.4-0.5])      | 10,374 (2.9%, [2.8-3])       | 14,428 (6.3%, [6.2-6.4])     | 42,367 (17.5%, [17.3-17.6])  | 70,477          |
|                                | Previous COVID-19 with unknown time    | 26 (0%, [0-0])               | 56 (0%, [0-0])               | 34 (0%, [0-0])               | 67 (0%, [0-0])               | 183             |
|                                | Previous COVID-19 within 28 days       | 1,276 (0.2%, [0.2-0.2])      | 1,906 (0.5%, [0.5-0.6])      | 1,659 (0.7%, [0.7-0.8])      | 13,349 (5.5%, [5.4-5.6])     | 18,190          |
|                                | Suspected previous COVID-19            | 103,703 (14.5%, [14.5-14.6]) | 43,483 (12.1%, [12-12.3])    | 22,805 (10%, [9.8-10.1])     | 21,333 (8.8%, [8.7-8.9])     | 191,324         |

|                                          |                                  |                             |                             |                             |                              |             |
|------------------------------------------|----------------------------------|-----------------------------|-----------------------------|-----------------------------|------------------------------|-------------|
|                                          | Unknown                          | 691 (0.1%, [0.1-0.1])       | 285 (0.1%, [0.1-0.1])       | 154 (0.1%, [0.1-0.1])       | 185 (0.1%, [0.1-0.1])        | 1,315       |
| Vaccination status                       | NA                               | -                           | -                           | 912 (1.2%, [1.1-1.2])       | 2,882 (1.2%, [1.1-1.2])      | 3,794       |
|                                          | Not vaccinated                   | -                           | -                           | 3,650 (4.6%, [4.5-4.8])     | 9,030 (3.7%, [3.7-3.8])      | 12,680      |
|                                          | One dose                         | -                           | -                           | 519 (0.7%, [0.6-0.7])       | 1,496 (0.6%, [0.6-0.6])      | 2,015       |
|                                          | Three doses                      | -                           | -                           | 14,388 (18.2%, [17.9-18.5]) | 198,035 (81.7%, [81.5-81.8]) | 212,423     |
|                                          | Two doses                        | -                           | -                           | 56,135 (71%, [70.7-71.3])   | 20,246 (8.4%, [8.2-8.5])     | 76,381      |
|                                          | Unknown doses                    | -                           | -                           | 3,433 (4.3%, [4.2-4.5])     | 10,725 (4.4%, [4.3-4.5])     | 14,158      |
| Symptoms                                 | Symptomatic                      | 95,973 (13.5%, [13.4-13.5]) | 49,228 (13.8%, [13.6-13.9]) | 36,687 (16%, [15.9-16.2])   | 52,983 (21.9%, [21.7-22])    | 234,871     |
| Number of reported symptoms              | Mean (SD)                        | 0.52 (1.66)                 | 0.5 (1.63)                  | 0.61 (1.84)                 | 0.91 (2.34)                  | 0.6 (1.83)  |
| Sought medical attention for symptoms    | No                               | 87,252 (89.5%, [89.3-89.7]) | 43,636 (88.9%, [88.6-89.2]) | 31,933 (87.2%, [86.8-87.5]) | 47,231 (89.2%, [89-89.5])    | 210,052     |
|                                          | Yes                              | 10,203 (10.5%, [10.3-10.7]) | 5,457 (11.1%, [10.8-11.4])  | 4,701 (12.8%, [12.5-13.2])  | 5,698 (10.8%, [10.5-11])     | 26,059      |
| Symptoms affecting day-to-day activities | A lot                            | -                           | -                           | 2,291 (1%, [1-1])           | 4,931 (2%, [2-2.1])          | 7,222       |
|                                          | A little                         | -                           | -                           | 7,849 (3.4%, [3.4-3.5])     | 15,314 (6.3%, [6.2-6.4])     | 23,163      |
|                                          | Not at all                       | -                           | -                           | 4,938 (2.2%, [2.1-2.2])     | 9,270 (3.8%, [3.7-3.9])      | 14,208      |
|                                          | Don't know / PNA / Non-response  | -                           | -                           | 21,609 (9.4%, [9.3-9.6])    | 23,468 (9.7%, [9.6-9.8])     | 190,278     |
|                                          | No symptoms reported             | -                           | -                           | 192,247 (84%, [83.8-84.1])  | 189,431 (78.1%, [78-78.3])   | 1,307,639   |
| Days since onset of first symptom        | Mean (SD)                        | 7.93 (3.28)                 | 8.09 (3.28)                 | 7.89 (3.32)                 | 7.97 (3.29)                  | 7.95 (3.29) |
| Symptom in past 7 days                   | Loss or change of sense of smell | 2,453 (0.3%, [0.3-0.4])     | 1,392 (0.4%, [0.4-0.4])     | 1,460 (0.6%, [0.6-0.7])     | 2,273 (0.9%, [0.9-1])        | 7,578       |
|                                          | Loss or change of sense of taste | 2,876 (0.4%, [0.4-0.4])     | 1,551 (0.4%, [0.4-0.5])     | 1,420 (0.6%, [0.6-0.7])     | 2,362 (1%, [0.9-1])          | 8,209       |
|                                          | New persistent cough             | 4,710 (0.7%, [0.6-0.7])     | 2,120 (0.6%, [0.6-0.6])     | 3,599 (1.6%, [1.5-1.6])     | 7,212 (3%, [2.9-3])          | 17,641      |
|                                          | Fever                            | 5,666 (0.8%, [0.8-0.8])     | 2,515 (0.7%, [0.7-0.7])     | 2,619 (1.1%, [1.1-1.2])     | 4,450 (1.8%, [1.8-1.9])      | 15,250      |
|                                          | Runny nose                       | 24,262 (3.4%, [3.4-3.4])    | 12,008 (3.4%, [3.3-3.4])    | 11,105 (4.9%, [4.8-4.9])    | 19,335 (8%, [7.9-8.1])       | 66,710      |
|                                          | Sneezing                         | 24,496 (3.4%, [3.4-3.5])    | 10,909 (3%, [3-3.1])        | 9,673 (4.2%, [4.1-4.3])     | 15,087 (6.2%, [6.1-6.3])     | 60,165      |
|                                          | Blocked nose                     | 17,806 (2.5%, [2.5-2.5])    | 8,504 (2.4%, [2.3-2.4])     | 8,067 (3.5%, [3.4-3.6])     | 13,507 (5.6%, [5.5-5.7])     | 47,884      |

|                             |                          |                          |                          |                          |        |
|-----------------------------|--------------------------|--------------------------|--------------------------|--------------------------|--------|
| Sore eyes                   | 14,341 (2%, [2-2])       | 6,777 (1.9%, [1.8-1.9])  | 4,628 (2%, [2-2.1])      | 7,038 (2.9%, [2.8-3])    | 32,784 |
| Sore throat                 | 27,295 (3.8%, [3.8-3.9]) | 10,259 (2.9%, [2.8-2.9]) | 10,410 (4.5%, [4.5-4.6]) | 15,571 (6.4%, [6.3-6.5]) | 63,535 |
| Hoarse voice                | 8,322 (1.2%, [1.1-1.2])  | 3,292 (0.9%, [0.9-1])    | 4,509 (2%, [1.9-2])      | 7,247 (3%, [2.9-3.1])    | 23,370 |
| Headache                    | 39,332 (5.5%, [5.5-5.6]) | 20,835 (5.8%, [5.7-5.9]) | 13,727 (6%, [5.9-6.1])   | 21,475 (8.9%, [8.7-9])   | 95,369 |
| Dizziness                   | 12,857 (1.8%, [1.8-1.8]) | 6,128 (1.7%, [1.7-1.8])  | 4,372 (1.9%, [1.9-2])    | 6,307 (2.6%, [2.5-2.7])  | 29,664 |
| Appetite loss               | 6,676 (0.9%, [0.9-1])    | 3,318 (0.9%, [0.9-1])    | 2,736 (1.2%, [1.2-1.2])  | 4,296 (1.8%, [1.7-1.8])  | 17,026 |
| Nausea/vomiting             | 8,185 (1.1%, [1.1-1.2])  | 3,884 (1.1%, [1.1-1.1])  | 2,825 (1.2%, [1.2-1.3])  | 3,948 (1.6%, [1.6-1.7])  | 18,842 |
| Diarrhoea                   | 11,107 (1.6%, [1.5-1.6]) | 4,799 (1.3%, [1.3-1.4])  | 3,573 (1.6%, [1.5-1.6])  | 4,741 (2%, [1.9-2])      | 24,220 |
| Abdominal pain / belly ache | 14,707 (2.1%, [2-2.1])   | 6,934 (1.9%, [1.9-2])    | 4,619 (2%, [2-2.1])      | 6,096 (2.5%, [2.5-2.6])  | 32,356 |
| Shortness of breath         | 12,907 (1.8%, [1.8-1.8]) | 6,634 (1.9%, [1.8-1.9])  | 4,587 (2%, [1.9-2.1])    | 7,647 (3.2%, [3.1-3.2])  | 31,775 |
| Tight chest                 | 8,977 (1.3%, [1.2-1.3])  | 4,514 (1.3%, [1.2-1.3])  | 2,969 (1.3%, [1.3-1.3])  | 4,736 (2%, [1.9-2])      | 21,196 |
| Chest pain                  | 4,158 (0.6%, [0.6-0.6])  | 2,279 (0.6%, [0.6-0.7])  | 1,529 (0.7%, [0.6-0.7])  | 2,494 (1%, [1-1.1])      | 10,460 |
| Chills                      | 7,077 (1%, [1-1])        | 5,429 (1.5%, [1.5-1.6])  | 2,652 (1.2%, [1.1-1.2])  | 5,955 (2.5%, [2.4-2.5])  | 21,113 |
| Difficulty sleeping         | 26,551 (3.7%, [3.7-3.8]) | 14,043 (3.9%, [3.9-4])   | 8,956 (3.9%, [3.8-4])    | 13,035 (5.4%, [5.3-5.5]) | 62,585 |
| Tiredness                   | 39,897 (5.6%, [5.5-5.6]) | 19,756 (5.5%, [5.4-5.6]) | 14,813 (6.5%, [6.4-6.6]) | 23,072 (9.5%, [9.4-9.6]) | 97,538 |
| Severe fatigue              | 4,677 (0.7%, [0.6-0.7])  | 2,715 (0.8%, [0.7-0.8])  | 2,063 (0.9%, [0.9-0.9])  | 3,482 (1.4%, [1.4-1.5])  | 12,937 |
| Numbness/tingling           | 9,748 (1.4%, [1.3-1.4])  | 4,725 (1.3%, [1.3-1.4])  | 3,214 (1.4%, [1.4-1.5])  | 4,295 (1.8%, [1.7-1.8])  | 21,982 |
| Heavy arms/legs             | 8,527 (1.2%, [1.2-1.2])  | 4,017 (1.1%, [1.1-1.2])  | 2,707 (1.2%, [1.1-1.2])  | 4,080 (1.7%, [1.6-1.7])  | 19,331 |
| Muscle aches                | 21,342 (3%, [3-3])       | 11,069 (3.1%, [3-3.1])   | 7,488 (3.3%, [3.2-3.3])  | 11,866 (4.9%, [4.8-5])   | 51,765 |

**Supplementary Table 2** Characteristics of swab positives in study population. N (percent [95% CI]) or mean (SD).

NOTE: Individuals with Wild-type, Alpha and Delta variants were inferred by the time of infection; those with BA.2 and BA.1 variants were identified using sequencing. For this reason, the sum total of PCR positives with Omicron is lower in this table than the total reported in Supplementary Table 1, with the difference being those who either were not sequenced from rounds 17–19, or those who were sequenced but did not have BA.2 or BA.1.

| Variable                       | Category                               | Rounds 2-7<br>(Wild-type)  | Rounds 8-10<br>(Alpha)     | Rounds 12-15<br>(Delta)    | BA.1<br>(Omicron)          | BA.2<br>(Omicron)          | Total  |
|--------------------------------|----------------------------------------|----------------------------|----------------------------|----------------------------|----------------------------|----------------------------|--------|
| All participants               | All participants                       | 2,971 (100%, [99.9-100])   | 2,275 (100%, [99.9-100])   | 1,493 (100%, [99.8-100])   | 2,835 (100%, [99.9-100])   | 3,560 (100%, [99.9-100])   | 13,134 |
| Sex                            | Female                                 | 1,683 (56.6%, [54.9-58.4]) | 1,283 (56.4%, [54.3-58.4]) | 809 (54.2%, [51.7-56.7])   | 1,617 (57%, [55.2-58.8])   | 2,043 (57.4%, [55.8-59])   | 7,435  |
|                                | Male                                   | 1,288 (43.4%, [41.6-45.1]) | 992 (43.6%, [41.6-45.7])   | 684 (45.8%, [43.3-48.3])   | 1,218 (43%, [41.2-44.8])   | 1,517 (42.6%, [41-44.2])   | 5,699  |
| Age group                      | 18-24                                  | 239 (8%, [7.1-9.1])        | 178 (7.8%, [6.8-9])        | 60 (4%, [3.1-5.1])         | 153 (5.4%, [4.6-6.3])      | 235 (6.6%, [5.8-7.5])      | 865    |
|                                | 25-34                                  | 401 (13.5%, [12.3-14.8])   | 289 (12.7%, [11.4-14.1])   | 125 (8.4%, [7.1-9.9])      | 389 (13.7%, [12.5-15])     | 665 (18.7%, [17.4-20])     | 1,869  |
|                                | 35-44                                  | 475 (16%, [14.7-17.3])     | 401 (17.6%, [16.1-19.2])   | 298 (20%, [18-22.1])       | 484 (17.1%, [15.7-18.5])   | 688 (19.3%, [18.1-20.7])   | 2,346  |
|                                | 45-54                                  | 642 (21.6%, [20.2-23.1])   | 493 (21.7%, [20-23.4])     | 371 (24.8%, [22.7-27.1])   | 541 (19.1%, [17.7-20.6])   | 555 (15.6%, [14.4-16.8])   | 2,602  |
|                                | 55-64                                  | 618 (20.8%, [19.4-22.3])   | 510 (22.4%, [20.8-24.2])   | 307 (20.6%, [18.6-22.7])   | 618 (21.8%, [20.3-23.4])   | 646 (18.1%, [16.9-19.4])   | 2,699  |
|                                | 65-74                                  | 429 (14.4%, [13.2-15.7])   | 299 (13.1%, [11.8-14.6])   | 247 (16.5%, [14.7-18.5])   | 471 (16.6%, [15.3-18])     | 554 (15.6%, [14.4-16.8])   | 2,000  |
|                                | 75+                                    | 167 (5.6%, [4.8-6.5])      | 105 (4.6%, [3.8-5.6])      | 85 (5.7%, [4.6-7])         | 179 (6.3%, [5.5-7.3])      | 217 (6.1%, [5.4-6.9])      | 753    |
| Ethnicity                      | Asian                                  | 158 (5.4%, [4.6-6.3])      | 137 (6.1%, [5.2-7.2])      | 84 (5.7%, [4.6-7])         | 137 (4.9%, [4.2-5.8])      | 173 (5%, [4.3-5.7])        | 689    |
|                                | Black                                  | 40 (1.4%, [1-1.9])         | 42 (1.9%, [1.4-2.5])       | 31 (2.1%, [1.5-3])         | 49 (1.8%, [1.3-2.3])       | 45 (1.3%, [1-1.7])         | 207    |
|                                | Mixed                                  | 26 (0.9%, [0.6-1.3])       | 30 (1.3%, [0.9-1.9])       | 14 (1%, [0.6-1.6])         | 50 (1.8%, [1.4-2.4])       | 73 (2.1%, [1.7-2.6])       | 193    |
|                                | Other                                  | 23 (0.8%, [0.5-1.2])       | 20 (0.9%, [0.6-1.4])       | 19 (1.3%, [0.8-2])         | 26 (0.9%, [0.6-1.4])       | 37 (1.1%, [0.8-1.5])       | 125    |
|                                | White                                  | 2,676 (91.5%, [90.5-92.5]) | 2,002 (89.7%, [88.4-90.9]) | 1,319 (89.9%, [88.3-91.3]) | 2,510 (90.5%, [89.4-91.6]) | 3,149 (90.6%, [89.5-91.5]) | 11,656 |
| PCR positive at time of survey | Yes                                    | 2,971 (100%, [99.9-100])   | 2,275 (100%, [99.9-100])   | 1,493 (100%, [99.8-100])   | 2,835 (100%, [99.9-100])   | 3,560 (100%, [99.9-100])   | 13,134 |
| Prior COVID-19                 | No previous COVID-19                   | 1,840 (61.9%, [60.2-63.7]) | 1,011 (44.4%, [42.4-46.5]) | 563 (37.7%, [35.3-40.2])   | 816 (28.8%, [27.1-30.5])   | 877 (24.6%, [23.2-26.1])   | 5,107  |
|                                | Previous COVID-19 greater than 28 days | 35 (1.2%, [0.8-1.6])       | 86 (3.8%, [3.1-4.6])       | 51 (3.4%, [2.6-4.5])       | 148 (5.2%, [4.5-6.1])      | 198 (5.6%, [4.9-6.4])      | 518    |
|                                | Previous COVID-19 with unknown time    | 3 (0.1%, [0-0.3])          | 4 (0.2%, [0.1-0.5])        | 0 (0%, [0-0.2])            | 2 (0.1%, [0-0.3])          | 1 (0%, [0-0.2])            | 10     |

|                                          |                                  |                            |                            |                          |                            |                            |             |
|------------------------------------------|----------------------------------|----------------------------|----------------------------|--------------------------|----------------------------|----------------------------|-------------|
|                                          | Previous COVID-19 within 28 days | 586 (19.7%, [18.3-21.2])   | 766 (33.7%, [31.8-35.6])   | 722 (48.4%, [45.8-50.9]) | 1,665 (58.7%, [56.9-60.5]) | 2,188 (61.5%, [59.9-63])   | 5,927       |
|                                          | Suspected previous COVID-19      | 500 (16.8%, [15.5-18.2])   | 403 (17.7%, [16.2-19.3])   | 152 (10.2%, [8.7-11.8])  | 200 (7.1%, [6.2-8.1])      | 291 (8.2%, [7.3-9.1])      | 1,546       |
|                                          | Unknown                          | 7 (0.2%, [0.1-0.5])        | 5 (0.2%, [0.1-0.5])        | 5 (0.3%, [0.1-0.8])      | 4 (0.1%, [0.1-0.4])        | 5 (0.1%, [0.1-0.3])        | 26          |
| Vaccination status                       | NA                               | -                          | -                          | 11 (1.5%, [0.8-2.7])     | 36 (1.3%, [0.9-1.8])       | 33 (0.9%, [0.7-1.3])       | 80          |
|                                          | Not vaccinated                   | -                          | -                          | 28 (3.8%, [2.6-5.4])     | 77 (2.7%, [2.2-3.4])       | 106 (3%, [2.5-3.6])        | 211         |
|                                          | One dose                         | -                          | -                          | 11 (1.5%, [0.8-2.7])     | 15 (0.5%, [0.3-0.9])       | 23 (0.6%, [0.4-1])         | 49          |
|                                          | Three doses                      | -                          | -                          | 73 (9.9%, [8-12.3])      | 2,276 (80.3%, [78.8-81.7]) | 2,925 (82.2%, [80.9-83.4]) | 5,274       |
|                                          | Two doses                        | -                          | -                          | 579 (78.6%, [75.5-81.4]) | 284 (10%, [9-11.2])        | 265 (7.4%, [6.6-8.4])      | 1,128       |
|                                          | Unknown doses                    | -                          | -                          | 35 (4.7%, [3.4-6.5])     | 147 (5.2%, [4.4-6.1])      | 208 (5.8%, [5.1-6.7])      | 390         |
| Symptoms                                 | Symptomatic                      | 1,338 (45%, [43.3-46.8])   | 1,245 (54.7%, [52.7-56.8]) | 952 (63.8%, [61.3-66.2]) | 1,984 (70%, [68.3-71.6])   | 2,701 (75.9%, [74.4-77.2]) | 8,220       |
| Number of reported symptoms              | Mean (SD)                        | 2.7 (4.1)                  | 3.38 (4.5)                 | 4.63 (5.21)              | 4.63 (4.72)                | 6.02 (5.26)                | 4.15 (4.83) |
| Sought medical attention for symptoms    | No                               | 1,187 (88.7%, [86.9-90.3]) | 1,091 (87.7%, [85.8-89.4]) | 850 (89.5%, [87.4-91.3]) | 1,865 (94.1%, [93-95.1])   | 2,522 (93.4%, [92.4-94.3]) | 7,515       |
|                                          | Yes                              | 151 (11.3%, [9.7-13.1])    | 153 (12.3%, [10.6-14.2])   | 100 (10.5%, [8.7-12.6])  | 117 (5.9%, [4.9-7])        | 179 (6.6%, [5.7-7.6])      | 700         |
| Symptoms affecting day-to-day activities | A lot                            | -                          | -                          | 157 (10.5%, [9.1-12.2])  | 303 (10.7%, [9.6-11.9])    | 625 (17.6%, [16.3-18.8])   | 1,085       |
|                                          | A little                         | -                          | -                          | 283 (19%, [17-21])       | 650 (22.9%, [21.4-24.5])   | 948 (26.6%, [25.2-28.1])   | 1,881       |
|                                          | Not at all                       | -                          | -                          | 83 (5.6%, [4.5-6.8])     | 282 (9.9%, [8.9-11.1])     | 266 (7.5%, [6.7-8.4])      | 631         |
|                                          | Don't know / PNA / Non-response  | -                          | -                          | 429 (28.7%, [26.5-31.1]) | 749 (26.4%, [24.8-28.1])   | 862 (24.2%, [22.8-25.6])   | 4,623       |
|                                          | No symptoms reported             | -                          | -                          | 541 (36.2%, [33.8-38.7]) | 851 (30%, [28.4-31.7])     | 859 (24.1%, [22.8-25.6])   | 4,914       |
| Days since onset of first symptom        | Mean (SD)                        | 7.08 (3.19)                | 7.58 (3.14)                | 6.85 (3.19)              | 6.62 (3.04)                | 6.06 (2.94)                | 7.06 (3.16) |
| Symptom in past 7 days                   | Loss or change of sense of smell | 399 (13.4%, [12.3-14.7])   | 323 (14.2%, [12.8-15.7])   | 367 (24.6%, [22.5-26.8]) | 214 (7.5%, [6.6-8.6])      | 349 (9.8%, [8.9-10.8])     | 1,652       |
|                                          | Loss or change of sense of taste | 355 (11.9%, [10.8-13.2])   | 329 (14.5%, [13.1-16])     | 340 (22.8%, [20.7-25])   | 258 (9.1%, [8.1-10.2])     | 408 (11.5%, [10.5-12.5])   | 1,690       |
|                                          | New persistent                   | 260 (8.8%, [7.8-9.8])      | 326 (14.3%, [12.9-15.8])   | 380 (25.5%, [23.3-27.7]) | 703 (24.8%, [23.2-26.4])   | 1,249 (35.1%, [33.5-36.7]) | 2,918       |

|                            |                                     |                          |                          |                          |                            |                            |       |
|----------------------------|-------------------------------------|--------------------------|--------------------------|--------------------------|----------------------------|----------------------------|-------|
|                            | cough                               |                          |                          |                          |                            |                            |       |
|                            | Fever                               | 292 (9.8%, [8.8-11])     | 262 (11.5%, [10.3-12.9]) | 305 (20.4%, [18.5-22.5]) | 498 (17.6%, [16.2-19])     | 922 (25.9%, [24.5-27.4])   | 2,279 |
|                            | Runny nose                          | 389 (13.1%, [11.9-14.4]) | 384 (16.9%, [15.4-18.5]) | 505 (33.8%, [31.5-36.3]) | 1,146 (40.4%, [38.6-42.2]) | 1,825 (51.3%, [49.6-52.9]) | 4,249 |
|                            | Sneezing                            | 411 (13.8%, [12.6-15.1]) | 404 (17.8%, [16.2-19.4]) | 436 (29.2%, [27-31.6])   | 1,017 (35.9%, [34.1-37.7]) | 1,572 (44.2%, [42.5-45.8]) | 3,840 |
|                            | Blocked nose                        | 387 (13%, [11.9-14.3])   | 401 (17.6%, [16.1-19.2]) | 402 (26.9%, [24.7-29.2]) | 804 (28.4%, [26.7-30])     | 1,383 (38.8%, [37.3-40.5]) | 3,377 |
|                            | Sore eyes                           | 240 (8.1%, [7.2-9.1])    | 215 (9.5%, [8.3-10.7])   | 199 (13.3%, [11.7-15.1]) | 358 (12.6%, [11.5-13.9])   | 568 (16%, [14.8-17.2])     | 1,580 |
|                            | Sore throat                         | 409 (13.8%, [12.6-15.1]) | 386 (17%, [15.5-18.6])   | 374 (25.1%, [22.9-27.3]) | 1,073 (37.8%, [36.1-39.6]) | 1,734 (48.7%, [47.1-50.4]) | 3,976 |
|                            | Hoarse voice                        | 194 (6.5%, [5.7-7.5])    | 184 (8.1%, [7-9.3])      | 221 (14.8%, [13.1-16.7]) | 631 (22.3%, [20.8-23.8])   | 1,043 (29.3%, [27.8-30.8]) | 2,273 |
|                            | Headache                            | 740 (24.9%, [23.4-26.5]) | 670 (29.5%, [27.6-31.4]) | 553 (37%, [34.6-39.5])   | 1,130 (39.9%, [38.1-41.7]) | 1,684 (47.3%, [45.7-48.9]) | 4,777 |
|                            | Dizziness                           | 237 (8%, [7.1-9])        | 223 (9.8%, [8.6-11.1])   | 187 (12.5%, [10.9-14.3]) | 309 (10.9%, [9.8-12.1])    | 536 (15.1%, [13.9-16.3])   | 1,492 |
|                            | Appetite loss                       | 308 (10.4%, [9.3-11.5])  | 319 (14%, [12.7-15.5])   | 238 (15.9%, [14.2-17.9]) | 292 (10.3%, [9.2-11.5])    | 562 (15.8%, [14.6-17])     | 1,719 |
|                            | Nausea/vomiting                     | 153 (5.1%, [4.4-6])      | 141 (6.2%, [5.3-7.3])    | 107 (7.2%, [6-8.6])      | 185 (6.5%, [5.7-7.5])      | 289 (8.1%, [7.3-9.1])      | 875   |
|                            | Diarrhoea                           | 180 (6.1%, [5.3-7])      | 171 (7.5%, [6.5-8.7])    | 122 (8.2%, [6.9-9.7])    | 209 (7.4%, [6.5-8.4])      | 280 (7.9%, [7-8.8])        | 962   |
|                            | Abdominal pain /<br>belly ache      | 180 (6.1%, [5.3-7])      | 165 (7.3%, [6.3-8.4])    | 103 (6.9%, [5.7-8.3])    | 192 (6.8%, [5.9-7.8])      | 328 (9.2%, [8.3-10.2])     | 968   |
|                            | Shortness of breath                 | 223 (7.5%, [6.6-8.5])    | 232 (10.2%, [9-11.5])    | 185 (12.4%, [10.8-14.2]) | 353 (12.5%, [11.3-13.7])   | 575 (16.2%, [15-17.4])     | 1,568 |
|                            | Tight chest                         | 204 (6.9%, [6-7.8])      | 203 (8.9%, [7.8-10.2])   | 139 (9.3%, [7.9-10.9])   | 270 (9.5%, [8.5-10.7])     | 423 (11.9%, [10.9-13])     | 1,239 |
|                            | Chest pain                          | 83 (2.8%, [2.3-3.4])     | 87 (3.8%, [3.1-4.7])     | 50 (3.3%, [2.5-4.4])     | 119 (4.2%, [3.5-5])        | 202 (5.7%, [5-6.5])        | 541   |
|                            | Chills                              | 309 (10.4%, [9.4-11.5])  | 330 (14.5%, [13.1-16])   | 252 (16.9%, [15.1-18.9]) | 495 (17.5%, [16.1-18.9])   | 880 (24.7%, [23.3-26.2])   | 2,266 |
|                            | Difficulty sleeping                 | 349 (11.7%, [10.6-13])   | 323 (14.2%, [12.8-15.7]) | 263 (17.6%, [15.8-19.6]) | 520 (18.3%, [17-19.8])     | 788 (22.1%, [20.8-23.5])   | 2,243 |
|                            | Tiredness                           | 727 (24.5%, [23-26])     | 700 (30.8%, [28.9-32.7]) | 534 (35.8%, [33.4-38.2]) | 1,073 (37.8%, [36.1-39.6]) | 1,658 (46.6%, [44.9-48.2]) | 4,692 |
|                            | Severe fatigue                      | 149 (5%, [4.3-5.9])      | 167 (7.3%, [6.3-8.5])    | 118 (7.9%, [6.6-9.4])    | 168 (5.9%, [5.1-6.9])      | 331 (9.3%, [8.4-10.3])     | 933   |
|                            | Numbness/tingling                   | 110 (3.7%, [3.1-4.4])    | 90 (4%, [3.2-4.8])       | 58 (3.9%, [3-5])         | 126 (4.4%, [3.7-5.3])      | 214 (6%, [5.3-6.8])        | 598   |
|                            | Heavy arms/legs                     | 196 (6.6%, [5.8-7.5])    | 193 (8.5%, [7.4-9.7])    | 100 (6.7%, [5.5-8.1])    | 228 (8%, [7.1-9.1])        | 419 (11.8%, [10.8-12.9])   | 1,136 |
|                            | Muscle aches                        | 549 (18.5%, [17.1-19.9]) | 463 (20.4%, [18.7-22.1]) | 372 (24.9%, [22.8-27.2]) | 766 (27%, [25.4-28.7])     | 1,198 (33.7%, [32.1-35.2]) | 3,348 |
| First reported<br>symptoms | Loss or change of<br>sense of smell | 109 (3.7%, [3.1-4.4])    | 82 (3.6%, [2.9-4.5])     | 73 (4.9%, [3.9-6.1])     | 36 (1.3%, [0.9-1.8])       | 46 (1.3%, [1-1.7])         | 346   |
|                            | Loss or change of<br>sense of taste | 96 (3.2%, [2.7-3.9])     | 83 (3.6%, [3-4.5])       | 66 (4.4%, [3.5-5.6])     | 38 (1.3%, [1-1.8])         | 59 (1.7%, [1.3-2.1])       | 342   |
|                            | New persistent                      | 125 (4.2%, [3.5-5])      | 148 (6.5%, [5.6-7.6])    | 168 (11.3%, [9.7-13])    | 255 (9%, [8-10.1])         | 375 (10.5%, [9.6-11.6])    | 1,071 |

|                             |                          |                          |                          |                          |                          |       |
|-----------------------------|--------------------------|--------------------------|--------------------------|--------------------------|--------------------------|-------|
| cough                       |                          |                          |                          |                          |                          |       |
| Fever                       | 112 (3.8%, [3.1-4.5])    | 104 (4.6%, [3.8-5.5])    | 83 (5.6%, [4.5-6.8])     | 133 (4.7%, [4-5.5])      | 232 (6.5%, [5.8-7.4])    | 664   |
| Runny nose                  | 129 (4.3%, [3.7-5.1])    | 110 (4.8%, [4-5.8])      | 176 (11.8%, [10.2-13.5]) | 363 (12.8%, [11.6-14.1]) | 561 (15.8%, [14.6-17])   | 1,339 |
| Sneezing                    | 125 (4.2%, [3.5-5])      | 122 (5.4%, [4.5-6.4])    | 146 (9.8%, [8.4-11.4])   | 304 (10.7%, [9.6-11.9])  | 442 (12.4%, [11.4-13.5]) | 1,139 |
| Blocked nose                | 120 (4%, [3.4-4.8])      | 138 (6.1%, [5.2-7.1])    | 98 (6.6%, [5.4-7.9])     | 203 (7.2%, [6.3-8.2])    | 304 (8.5%, [7.7-9.5])    | 863   |
| Sore eyes                   | 77 (2.6%, [2.1-3.2])     | 65 (2.9%, [2.2-3.6])     | 42 (2.8%, [2.1-3.8])     | 91 (3.2%, [2.6-3.9])     | 147 (4.1%, [3.5-4.8])    | 422   |
| Sore throat                 | 206 (6.9%, [6.1-7.9])    | 183 (8%, [7-9.2])        | 186 (12.5%, [10.9-14.2]) | 620 (21.9%, [20.4-23.4]) | 1,084 (30.4%, [29-32])   | 2,279 |
| Hoarse voice                | 50 (1.7%, [1.3-2.2])     | 38 (1.7%, [1.2-2.3])     | 59 (4%, [3.1-5.1])       | 159 (5.6%, [4.8-6.5])    | 212 (6%, [5.2-6.8])      | 518   |
| Headache                    | 384 (12.9%, [11.8-14.2]) | 340 (14.9%, [13.5-16.5]) | 250 (16.7%, [14.9-18.7]) | 508 (17.9%, [16.6-19.4]) | 716 (20.1%, [18.8-21.5]) | 2,198 |
| Dizziness                   | 76 (2.6%, [2-3.2])       | 65 (2.9%, [2.2-3.6])     | 41 (2.7%, [2-3.7])       | 64 (2.3%, [1.8-2.9])     | 116 (3.3%, [2.7-3.9])    | 362   |
| Appetite loss               | 69 (2.3%, [1.8-2.9])     | 78 (3.4%, [2.8-4.3])     | 48 (3.2%, [2.4-4.2])     | 49 (1.7%, [1.3-2.3])     | 85 (2.4%, [1.9-2.9])     | 329   |
| Nausea/vomiting             | 38 (1.3%, [0.9-1.8])     | 30 (1.3%, [0.9-1.9])     | 28 (1.9%, [1.3-2.7])     | 44 (1.6%, [1.2-2.1])     | 81 (2.3%, [1.8-2.8])     | 221   |
| Diarrhoea                   | 47 (1.6%, [1.2-2.1])     | 46 (2%, [1.5-2.7])       | 30 (2%, [1.4-2.9])       | 46 (1.6%, [1.2-2.2])     | 69 (1.9%, [1.5-2.4])     | 238   |
| Abdominal pain / belly ache | 58 (2%, [1.5-2.5])       | 44 (1.9%, [1.4-2.6])     | 18 (1.2%, [0.8-1.9])     | 43 (1.5%, [1.1-2])       | 70 (2%, [1.6-2.5])       | 233   |
| Shortness of breath         | 69 (2.3%, [1.8-2.9])     | 67 (2.9%, [2.3-3.7])     | 32 (2.1%, [1.5-3])       | 77 (2.7%, [2.2-3.4])     | 109 (3.1%, [2.5-3.7])    | 354   |
| Tight chest                 | 45 (1.5%, [1.1-2])       | 48 (2.1%, [1.6-2.8])     | 31 (2.1%, [1.5-2.9])     | 51 (1.8%, [1.4-2.4])     | 77 (2.2%, [1.7-2.7])     | 252   |
| Chest pain                  | 19 (0.6%, [0.4-1])       | 11 (0.5%, [0.3-0.9])     | 10 (0.7%, [0.4-1.2])     | 20 (0.7%, [0.5-1.1])     | 36 (1%, [0.7-1.4])       | 96    |
| Chills                      | 103 (3.5%, [2.9-4.2])    | 131 (5.8%, [4.9-6.8])    | 60 (4%, [3.1-5.1])       | 139 (4.9%, [4.2-5.8])    | 271 (7.6%, [6.8-8.5])    | 704   |
| Difficulty sleeping         | 114 (3.8%, [3.2-4.6])    | 104 (4.6%, [3.8-5.5])    | 77 (5.2%, [4.1-6.4])     | 118 (4.2%, [3.5-5])      | 184 (5.2%, [4.5-5.9])    | 597   |
| Tiredness                   | 314 (10.6%, [9.5-11.7])  | 264 (11.6%, [10.4-13])   | 202 (13.5%, [11.9-15.4]) | 385 (13.6%, [12.4-14.9]) | 602 (16.9%, [15.7-18.2]) | 1,767 |
| Severe fatigue              | 57 (1.9%, [1.5-2.5])     | 49 (2.2%, [1.6-2.8])     | 35 (2.3%, [1.7-3.2])     | 48 (1.7%, [1.3-2.2])     | 93 (2.6%, [2.1-3.2])     | 282   |
| Numbness/tingling           | 30 (1%, [0.7-1.4])       | 25 (1.1%, [0.7-1.6])     | 12 (0.8%, [0.5-1.4])     | 31 (1.1%, [0.8-1.5])     | 37 (1%, [0.8-1.4])       | 135   |
| Heavy arms/legs             | 58 (2%, [1.5-2.5])       | 53 (2.3%, [1.8-3])       | 21 (1.4%, [0.9-2.1])     | 44 (1.6%, [1.2-2.1])     | 86 (2.4%, [2-3])         | 262   |
| Muscle aches                | 249 (8.4%, [7.4-9.4])    | 197 (8.7%, [7.6-9.9])    | 121 (8.1%, [6.8-9.6])    | 261 (9.2%, [8.2-10.3])   | 378 (10.6%, [9.6-11.7])  | 1,206 |



**Supplementary Table 3** Odds ratios for swab positivity based on presence or absence of any of 26 symptoms surveyed in N=1,542,510 participants across selected rounds of REACT-1. ORs are derived from logistic regression models with swab positive (1/0) as the outcome variable, adjusted for age group, sex and vaccination status. 95% confidence intervals are shown.

| Symptom                          | Wild-type              | Alpha                 | Delta                  | BA.1                | BA.2                |
|----------------------------------|------------------------|-----------------------|------------------------|---------------------|---------------------|
|                                  | Rounds 2-7             | Rounds 8-10           | Rounds 13-15           | Rounds 17-19        | Rounds 17-19        |
|                                  | <i>June – Dec 2020</i> | <i>Jan – Mar 2021</i> | <i>June – Nov 2021</i> | <i>Jan–Mar 2022</i> | <i>Jan–Mar 2022</i> |
| <b>Any of 26 symptoms</b>        | 5.16 (4.79,5.55)       | 6.01 (5.12,7.06)      | 9.53 (8.55,10.6)       | 9.61 (8.82,10.5)    | 12.9 (11.9,14.0)    |
| Loss or change of sense of smell | 49.7 (44.3,55.7)       | 37.8 (28.6,50.0)      | 73.4 (64.2,83.9)       | 12.9 (11.1,15.1)    | 17.2 (15.1,19.5)    |
| Loss or change of sense of taste | 35.9 (31.9,40.4)       | 38.9 (29.9,50.6)      | 68.1 (59.4,78.0)       | 16.0 (13.9,18.5)    | 21.3 (18.9,24.0)    |
| New persistent cough             | 13.9 (12.2,15.8)       | 31.9 (24.9,40.9)      | 25.9 (22.9,29.3)       | 16.4 (14.9,18.0)    | 26.2 (24.2,28.3)    |
| Fever                            | 13.3 (11.7,15.0)       | 16.2 (12.2,21.4)      | 26.3 (23.0,30.1)       | 18.4 (16.5,20.5)    | 30.2 (27.7,33.0)    |
| Appetite loss                    | 12.0 (10.6,13.6)       | 15.2 (11.8,19.7)      | 17.8 (15.4,20.7)       | 8.56 (7.50,9.77)    | 13.6 (12.3,15.1)    |
| Chills                           | 11.5 (10.2,13.0)       | 9.79 (7.62,12.6)      | 19.3 (16.7,22.2)       | 11.5 (10.4,12.8)    | 17.9 (16.4,19.4)    |
| Severe fatigue                   | 7.70 (6.51,9.11)       | 8.74 (6.28,12.1)      | 10.5 (8.69,12.7)       | 5.30 (4.49,6.26)    | 8.16 (7.21,9.25)    |
| Muscle aches                     | 7.32 (6.66,8.04)       | 7.44 (6.06,9.15)      | 10.3 (9.16,11.7)       | 9.02 (8.25,9.87)    | 12.5 (11.6,13.5)    |
| Hoarse voice                     | 5.88 (5.07,6.81)       | 8.80 (6.40,12.1)      | 9.28 (8.00,10.8)       | 12.8 (11.7,14.2)    | 18.9 (17.4,20.5)    |
| Heavy arms/legs                  | 5.87 (5.07,6.80)       | 6.96 (5.06,9.56)      | 6.19 (5.04,7.61)       | 6.07 (5.25,7.02)    | 9.47 (8.46,10.6)    |
| Tight chest                      | 5.57 (4.82,6.44)       | 6.13 (4.45,8.45)      | 7.91 (6.59,9.51)       | 6.40 (5.59,7.31)    | 7.96 (7.12,8.90)    |
| Headache                         | 5.49 (5.04,5.98)       | 5.88 (4.90,7.07)      | 9.83 (8.80,11.0)       | 8.28 (7.62,8.98)    | 11.2 (10.5,12.1)    |
| Blocked nose                     | 5.45 (4.89,6.08)       | 8.26 (6.63,10.3)      | 11.1 (9.85,12.5)       | 8.47 (7.75,9.25)    | 13.2 (12.3,14.3)    |
| Tiredness                        | 5.33 (4.89,5.80)       | 6.75 (5.64,8.07)      | 8.27 (7.41,9.23)       | 6.78 (6.25,7.36)    | 9.76 (9.09,10.5)    |
| Chest pain                       | 4.59 (3.68,5.72)       | 3.75 (2.24,6.28)      | 4.93 (3.67,6.62)       | 4.86 (3.99,5.91)    | 6.40 (5.48,7.47)    |
| Dizziness                        | 4.58 (4.00,5.24)       | 5.46 (4.10,7.28)      | 7.65 (6.53,8.96)       | 5.46 (4.82,6.19)    | 7.76 (7.02,8.57)    |
| Shortness of breath              | 4.45 (3.88,5.11)       | 6.39 (4.90,8.34)      | 7.40 (6.31,8.66)       | 5.16 (4.58,5.80)    | 7.02 (6.38,7.73)    |
| Nausea/vomiting                  | 4.34 (3.68,5.12)       | 5.95 (4.26,8.31)      | 6.40 (5.23,7.84)       | 5.05 (4.32,5.91)    | 5.90 (5.18,6.72)    |
| Sneezing                         | 4.28 (3.85,4.76)       | 7.06 (5.70,8.76)      | 10.0 (8.92,11.3)       | 10.9 (10.0,11.8)    | 15.0 (14.0,16.1)    |
| Sore eyes                        | 4.22 (3.69,4.82)       | 5.32 (4.03,7.02)      | 8.15 (7.00,9.49)       | 5.63 (5.00,6.34)    | 7.53 (6.83,8.29)    |
| Runny nose                       | 4.04 (3.62,4.50)       | 5.36 (4.28,6.72)      | 10.8 (9.67,12.1)       | 9.81 (9.05,10.6)    | 14.9 (13.9,16.0)    |
| Diarrhoea                        | 3.84 (3.30,4.48)       | 4.96 (3.57,6.88)      | 5.62 (4.64,6.81)       | 4.44 (3.82,5.15)    | 4.52 (3.96,5.16)    |
| Sore throat                      | 3.76 (3.38,4.19)       | 6.56 (5.24,8.20)      | 7.22 (6.38,8.18)       | 11.6 (10.7,12.6)    | 18.0 (16.8,19.4)    |
| Difficulty sleeping              | 3.30 (2.95,3.70)       | 3.23 (2.51,4.15)      | 5.39 (4.70,6.18)       | 4.48 (4.05,4.95)    | 5.45 (5.01,5.94)    |
| Abdominal pain / belly ache      | 2.89 (2.48,3.37)       | 2.37 (1.62,3.47)      | 3.74 (3.06,4.58)       | 3.13 (2.68,3.65)    | 4.17 (3.70,4.71)    |
| Numbness/tingling                | 2.80 (2.31,3.39)       | 2.66 (1.72,4.12)      | 2.95 (2.27,3.84)       | 2.78 (2.30,3.35)    | 4.00 (3.46,4.63)    |

**Supplementary Table 4** Unadjusted odds ratios for swab positivity based on presence or absence of any of 26 symptoms surveyed in N=1,542,510 participants across selected rounds of REACT-1. ORs are derived from logistic regression models with swab positive (1/0) as the outcome variable. 95% confidence intervals are shown.

| Symptom                          | Wild-type              | Alpha                 | Delta                  | BA.1                | BA.2                |
|----------------------------------|------------------------|-----------------------|------------------------|---------------------|---------------------|
|                                  | Rounds 2-7             | Rounds 8-10           | Rounds 13-15           | Rounds 17-19        | Rounds 17-19        |
|                                  | <i>June – Dec 2020</i> | <i>Jan – Mar 2021</i> | <i>June – Nov 2021</i> | <i>Jan–Mar 2022</i> | <i>Jan–Mar 2022</i> |
| <b>Any of 26 symptoms</b>        | 5.01 (4.68,5.36)       | 6.50 (6.02,7.02)      | 8.25 (7.52,9.06)       | 8.23 (7.64,8.86)    | 10.5 (9.76,11.2)    |
| Loss or change of sense of smell | 53.6 (47.9,60.0)       | 52.1 (45.7,59.4)      | 75.5 (66.6,85.7)       | 13.7 (11.8,15.9)    | 18.0 (16.0,20.4)    |
| Loss or change of sense of taste | 38.3 (34.1,43.0)       | 46.5 (40.9,52.9)      | 69.0 (60.6,78.5)       | 17.0 (14.8,19.5)    | 21.7 (19.4,24.4)    |
| New persistent cough             | 15.4 (13.5,17.5)       | 31.3 (27.7,35.5)      | 26.7 (23.7,30.0)       | 16.5 (15.1,18.1)    | 26.7 (24.8,28.7)    |
| Fever                            | 14.4 (12.8,16.3)       | 19.5 (17.1,22.3)      | 28.0 (24.7,31.8)       | 18.9 (17.0,21.0)    | 30.9 (28.4,33.6)    |
| Runny nose                       | 4.37 (3.92,4.86)       | 5.70 (5.11,6.36)      | 10.9 (9.79,12.0)       | 9.56 (8.87,10.3)    | 14.2 (13.3,15.2)    |
| Sneezing                         | 4.60 (4.15,5.11)       | 6.71 (6.03,7.47)      | 10.1 (9.10,11.3)       | 10.7 (9.89,11.5)    | 14.6 (13.7,15.7)    |
| Blocked nose                     | 6.00 (5.39,6.67)       | 8.68 (7.78,9.67)      | 11.1 (9.93,12.4)       | 8.48 (7.80,9.21)    | 13.3 (12.4,14.2)    |
| Sore eyes                        | 4.40 (3.86,5.02)       | 5.33 (4.63,6.14)      | 8.24 (7.12,9.55)       | 5.80 (5.18,6.50)    | 7.56 (6.89,8.30)    |
| Sore throat                      | 4.09 (3.68,4.54)       | 6.78 (6.08,7.56)      | 7.68 (6.85,8.61)       | 11.2 (10.4,12.1)    | 17.0 (15.9,18.1)    |
| Hoarse voice                     | 6.13 (5.29,7.10)       | 9.60 (8.23,11.2)      | 9.61 (8.33,11.1)       | 13.3 (12.1,14.6)    | 18.9 (17.5,20.4)    |
| Headache                         | 5.70 (5.25,6.18)       | 6.40 (5.86,7.00)      | 9.52 (8.61,10.5)       | 7.94 (7.37,8.57)    | 10.5 (9.87,11.2)    |
| Dizziness                        | 4.86 (4.25,5.55)       | 6.18 (5.37,7.10)      | 7.89 (6.78,9.18)       | 5.57 (4.93,6.28)    | 7.93 (7.21,8.72)    |
| Appetite loss                    | 12.9 (11.4,14.5)       | 18.2 (16.1,20.6)      | 18.3 (15.9,21.0)       | 8.63 (7.61,9.80)    | 13.9 (12.7,15.3)    |
| Nausea/vomiting                  | 4.83 (4.10,5.69)       | 5.99 (5.04,7.12)      | 6.85 (5.65,8.32)       | 5.01 (4.30,5.84)    | 6.27 (5.53,7.10)    |
| Diarrhoea                        | 4.20 (3.61,4.88)       | 5.94 (5.07,6.95)      | 6.13 (5.10,7.37)       | 4.64 (4.02,5.36)    | 4.93 (4.34,5.58)    |
| Abdominal pain / belly ache      | 3.14 (2.70,3.66)       | 3.89 (3.31,4.56)      | 3.93 (3.23,4.78)       | 3.20 (2.76,3.71)    | 4.41 (3.93,4.96)    |
| Shortness of breath              | 4.53 (3.95,5.19)       | 5.94 (5.18,6.81)      | 7.52 (6.46,8.76)       | 5.26 (4.70,5.90)    | 7.02 (6.41,7.70)    |
| Tight chest                      | 5.98 (5.19,6.90)       | 7.67 (6.62,8.88)      | 8.74 (7.34,10.4)       | 6.66 (5.85,7.58)    | 8.41 (7.56,9.35)    |
| Chest pain                       | 5.08 (4.08,6.33)       | 6.21 (4.99,7.72)      | 5.50 (4.15,7.29)       | 5.10 (4.22,6.16)    | 6.94 (5.99,8.05)    |
| Chills                           | 12.2 (10.8,13.7)       | 11.1 (9.85,12.5)      | 20.3 (17.7,23.2)       | 11.8 (10.7,13.1)    | 18.1 (16.7,19.6)    |
| Difficulty sleeping              | 3.51 (3.14,3.93)       | 3.94 (3.50,4.43)      | 5.74 (5.04,6.54)       | 4.56 (4.14,5.02)    | 5.65 (5.22,6.13)    |
| Tiredness                        | 5.48 (5.05,5.95)       | 7.21 (6.60,7.87)      | 8.34 (7.54,9.23)       | 6.72 (6.23,7.25)    | 9.38 (8.79,10.0)    |
| Severe fatigue                   | 8.37 (7.08,9.89)       | 10.6 (8.99,12.4)      | 11.1 (9.26,13.4)       | 5.45 (4.64,6.39)    | 8.70 (7.73,9.80)    |
| Numbness/tingling                | 2.85 (2.36,3.45)       | 3.02 (2.44,3.74)      | 3.03 (2.35,3.92)       | 2.82 (2.35,3.39)    | 3.88 (3.37,4.47)    |
| Heavy arms/legs                  | 6.04 (5.22,6.99)       | 8.20 (7.06,9.52)      | 6.56 (5.38,8.00)       | 6.42 (5.58,7.38)    | 9.68 (8.70,10.8)    |
| Muscle aches                     | 7.49 (6.83,8.21)       | 7.82 (7.06,8.66)      | 10.5 (9.32,11.7)       | 9.02 (8.28,9.81)    | 12.1 (11.3,13.0)    |

**Supplementary Table 5** Results from log-linear regression of symptom count as a function of BA.1 / BA.1 infection, age group, sex, booster vaccine received (y/n), weeks since most recent vaccine, prior COVID-19 (28 days or more before testing), weeks since symptom onset, and calendar time (since 1 Jan 2021) among 5,637 double- or triple-vaccinated swab-positive individuals with either BA.2 or BA.1 lineage infection. Errors are modelled as Poisson distributed. Odd Ratios and 95% confidence intervals are shown. Each column shows the addition of one covariate to the model. BA.2 infection (vs BA.1) is associated with reporting of more symptoms. This effect is robust to adjustment.

| Variable                          | Category     | Crude model                 | Plus age                     | Plus sex                     | Plus boosted                 | Plus weeks since vaccination | Plus prior COVID-19          | Plus weeks since symptom onset | Plus calendar time (weeks)  |
|-----------------------------------|--------------|-----------------------------|------------------------------|------------------------------|------------------------------|------------------------------|------------------------------|--------------------------------|-----------------------------|
| Omicron variant                   | BA.1 [ref]   | -                           | -                            | -                            | -                            | -                            | -                            | -                              | -                           |
|                                   | BA.2         | <b>1.3 (1.27,1.33) ****</b> | <b>1.29 (1.26,1.32) ****</b> | <b>1.29 (1.26,1.32) ****</b> | <b>1.29 (1.26,1.32) ****</b> | <b>1.28 (1.25,1.31) ****</b> | <b>1.29 (1.25,1.32) ****</b> | <b>1.19 (1.16,1.22) ****</b>   | <b>1.14 (1.1,1.19) ****</b> |
| Age                               | 18-24 [ref]  | -                           | -                            | -                            | -                            | -                            | -                            | -                              | -                           |
|                                   | 25-34        |                             | 1.06 (1,1.12) *              | 1.07 (1.02,1.13) **          | 1.07 (1.02,1.13) *           | 1.07 (1.01,1.13) *           | 1.08 (1.03,1.14) **          | 1.02 (0.96,1.07)               | 1.02 (0.97,1.08)            |
|                                   | 35-44        |                             | 1.09 (1.04,1.15) ***         | 1.11 (1.05,1.17) ***         | 1.11 (1.05,1.17) ***         | 1.1 (1.05,1.16) ***          | 1.11 (1.05,1.17) ***         | 1.06 (1,1.12) *                | 1.06 (1.01,1.12) *          |
|                                   | 45-54        |                             | 1.12 (1.06,1.18) ****        | 1.15 (1.09,1.21) ****        | 1.14 (1.08,1.2) ****         | 1.14 (1.08,1.2) ****         | 1.13 (1.07,1.19) ****        | 1.07 (1.02,1.13) *             | 1.08 (1.02,1.14) **         |
|                                   | 55-64        |                             | 1.01 (0.95,1.06)             | 1.04 (0.99,1.1)              | 1.03 (0.98,1.09)             | 1.03 (0.98,1.09)             | 1.03 (0.97,1.09)             | 1 (0.95,1.06)                  | 1.01 (0.96,1.07)            |
|                                   | 65-74        |                             | 0.83 (0.79,0.88) ****        | 0.87 (0.82,0.92) ****        | 0.87 (0.82,0.92) ****        | 0.86 (0.81,0.91) ****        | 0.85 (0.8,0.9) ****          | 0.85 (0.8,0.9) ****            | 0.86 (0.81,0.91) ****       |
| Sex                               | Female [ref] |                             |                              | 0.73 (0.68,0.78) ****        | 0.72 (0.67,0.78) ****        | 0.72 (0.66,0.77) ****        | 0.7 (0.65,0.76) ****         | 0.77 (0.72,0.84) ****          | 0.78 (0.72,0.84) ****       |
|                                   | Male         |                             |                              | -                            | -                            | -                            | -                            | -                              | -                           |
| Boosted (Yes)                     | No [ref]     |                             |                              |                              | 0.79 (0.77,0.81) ****        | 0.79 (0.77,0.81) ****        | 0.79 (0.77,0.81) ****        | 0.85 (0.83,0.87) ****          | 0.85 (0.83,0.87) ****       |
|                                   | Yes          |                             |                              |                              | -                            | -                            | -                            | -                              | -                           |
| Weeks since last vaccination      |              |                             |                              |                              |                              | 1.04 (1,1.09)                | 1.02 (0.98,1.07)             | 0.95 (0.91,0.99) *             | 0.93 (0.89,0.98) **         |
| Prior COVID-19 (28+ days ago)     | No [ref]     |                             |                              |                              |                              |                              | 1 (1,1)                      | 1 (1,1)                        | 1 (1,1)                     |
|                                   | Yes          |                             |                              |                              |                              |                              | -                            | -                              | -                           |
| Weeks since symptom onset         |              |                             |                              |                              |                              |                              |                              | 0.86 (0.82,0.91) ****          | 0.86 (0.82,0.91) ****       |
| Calendar time (weeks since 1 Jan) |              |                             |                              |                              |                              |                              |                              |                                | 1.04 (1.01,1.06) *          |

\* p<0.05, \*\* p<0.01, \*\*\* p<0.001, \*\*\*\* p<0.0001

Supplementary Figure 1 Comparison of Ct values in N=6,395 swab-positive respondents with Omicron BA.2 and BA.1 variants in REACT-1 rounds 17–19, stratified by symptom status (presence of any of 26 surveyed symptoms). A two-tailed Wilcoxon signed rank test was used to compare the Ct value distributions in BA.2 vs BA.1, within symptomatics and asymptomatics. Ct values are lower in BA.2, in both asymptomatic and symptomatic respondents.

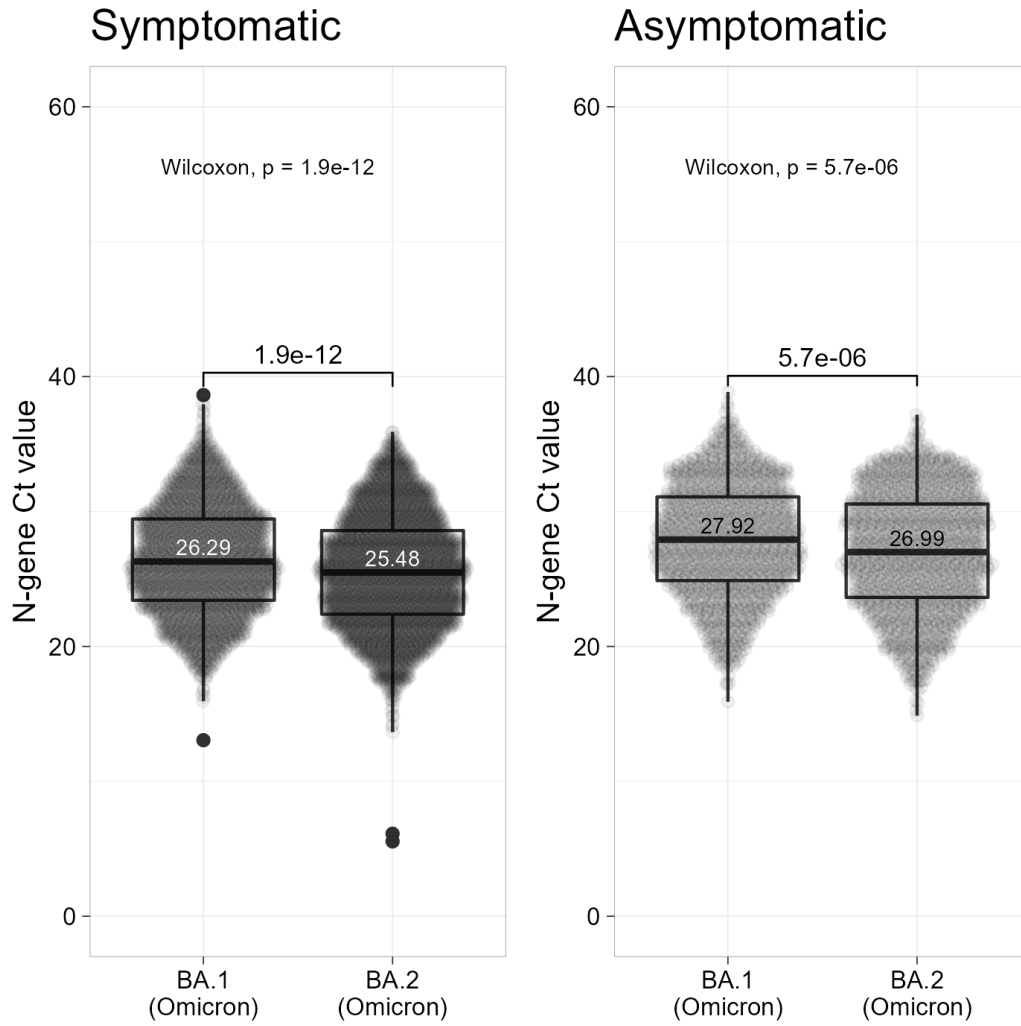

**Supplementary Figure 2** Plot showing the odds ratios and 95% confidence intervals for symptoms in a pooled analysis of N=1,542,510 participants across five variant-phases. For each of the symptoms, a logistic model was fit with this specification:

$$y[\text{PCR pos/neg}] \sim \text{covariates} [\text{age, sex, vaccination, calendar time}] + \text{variant} [\text{binary}] + \text{symptom} [y/n] + \text{variant:symptom} [\text{interaction}]$$

For the reference category variant (Wild-type) we report the odds ratio on the symptom. For subsequent variants, we report the product of the symptom odds ratio and the interaction effect with the relevant variant. Error bars show 95% confidence intervals. The patterns of changes in odds ratios between variants are consistent with the patterns shown in the stratified logistic regression analysis in Figure 2.: ORs are higher for BA.2 than BA.1 for nearly all symptoms. Fever and cough have the highest ORs for BA.2 and BA.1, while loss or change of smell or taste have the highest ORs in all previous variants.

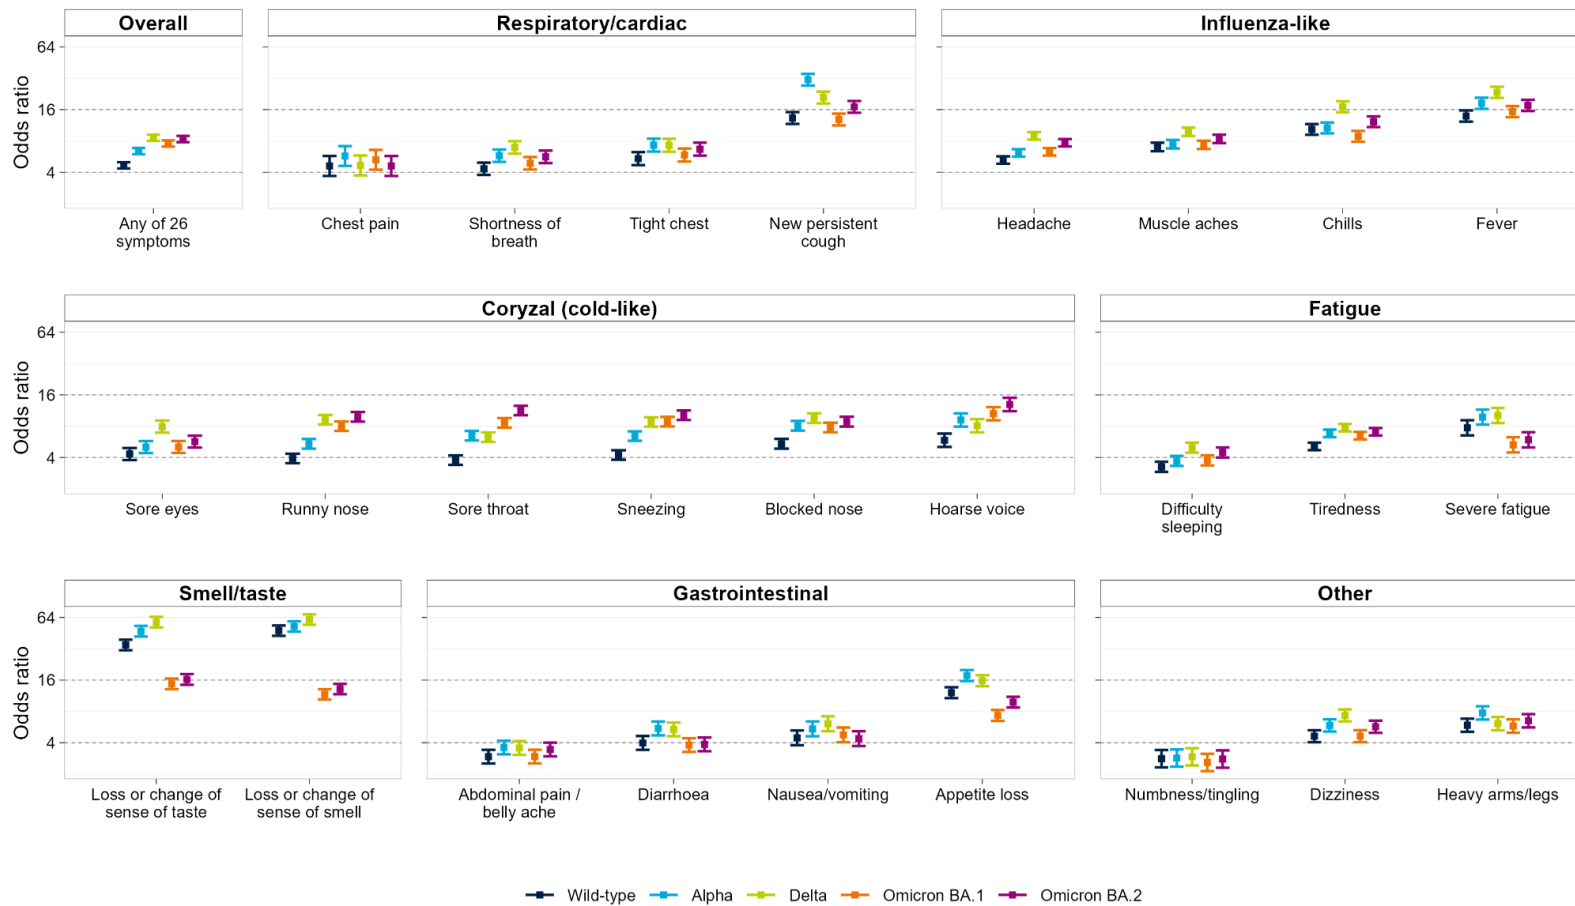

**Supplementary Figure 3** Results of LASSO stability selection with swab positive/negative as the binary outcome variable and each of 26 symptoms as predictors, N=1,542,510 participants in five phases of REACT-1 corresponding to periods of dominance of five SARS-CoV-2 variants in England. Age, sex and, where appropriate, vaccination status are forced into the models as unpenalised variables; regression coefficients for the symptoms are constrained to be positive. The median, 5th and 95th percentiles of the Area Under the Curve (AUCs) are obtained from unpenalised models adding each symptom incrementally (from top to bottom) applied on un-seen holdout data.

### A Wild type

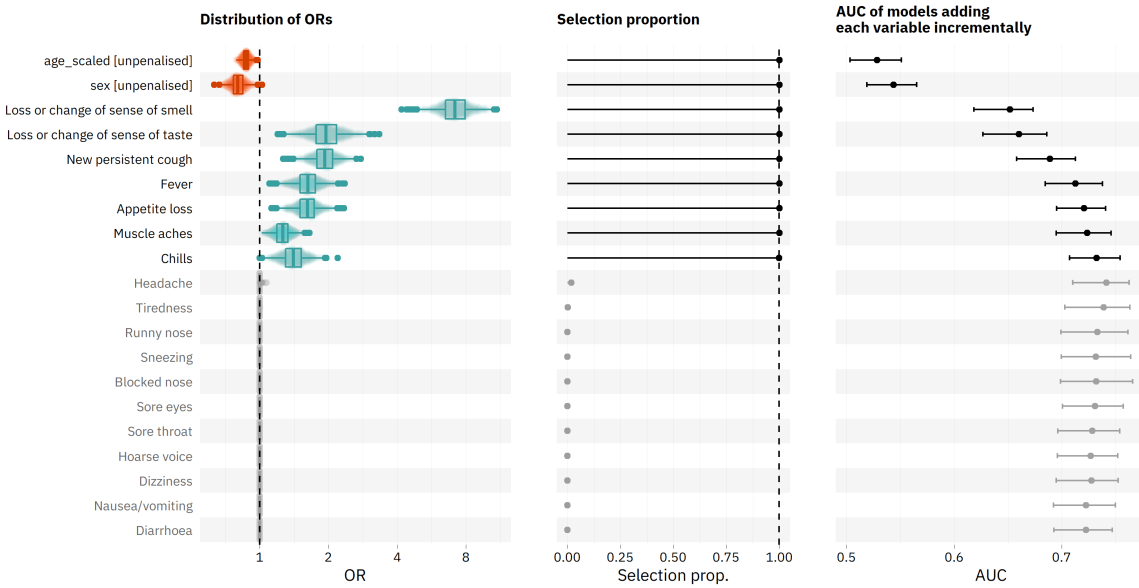

### B Alpha

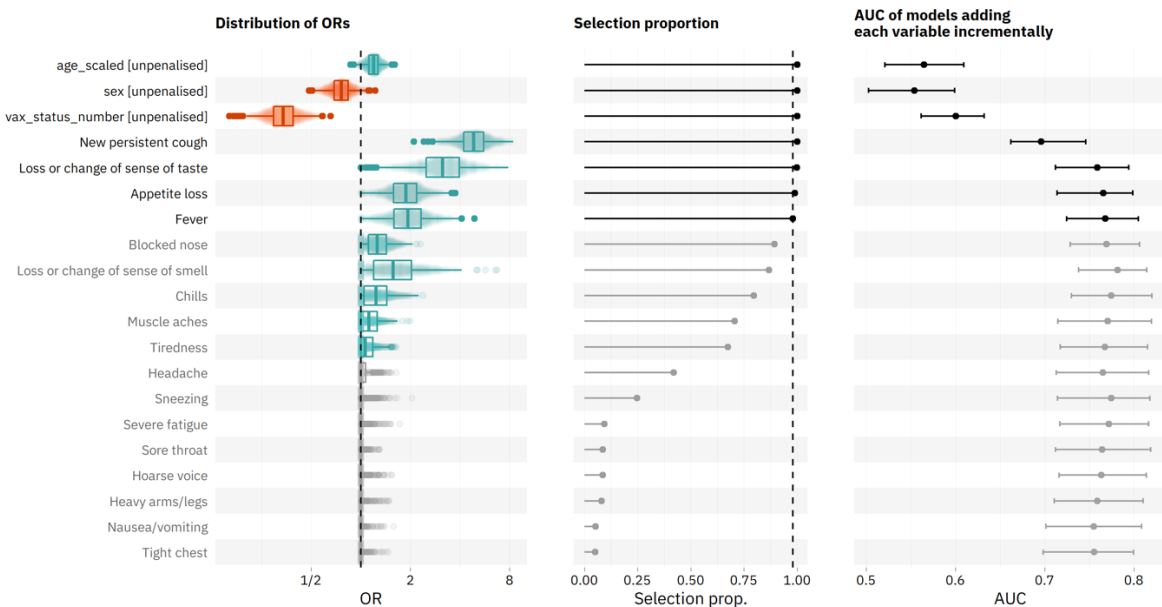

# C Delta

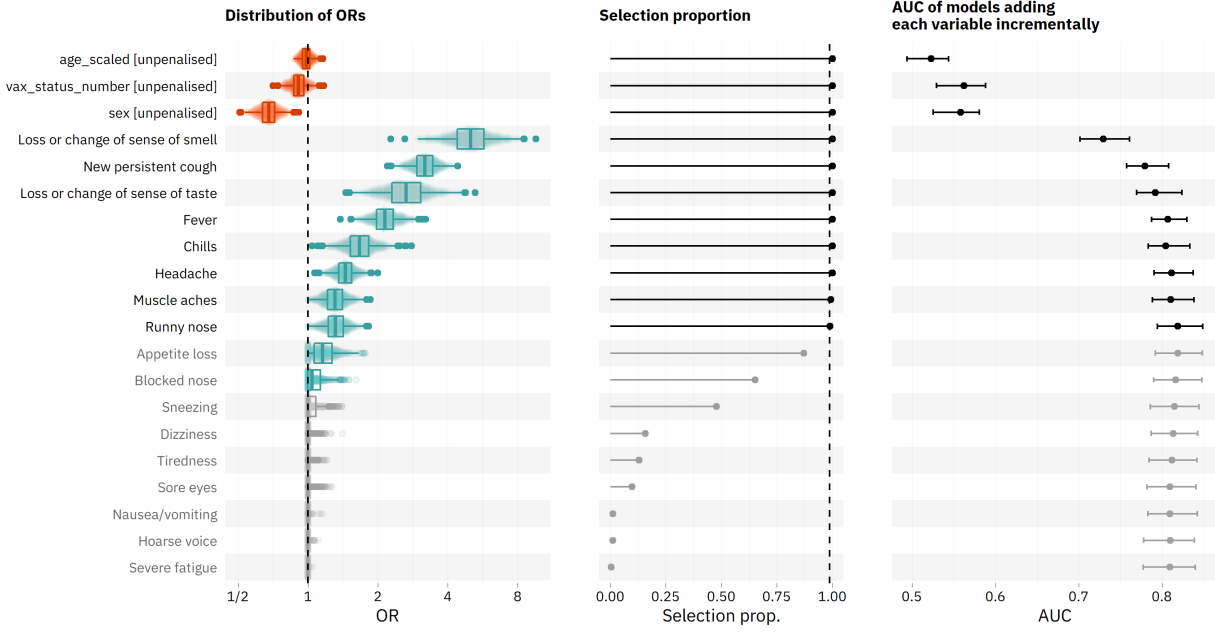

# D Omicron BA.1

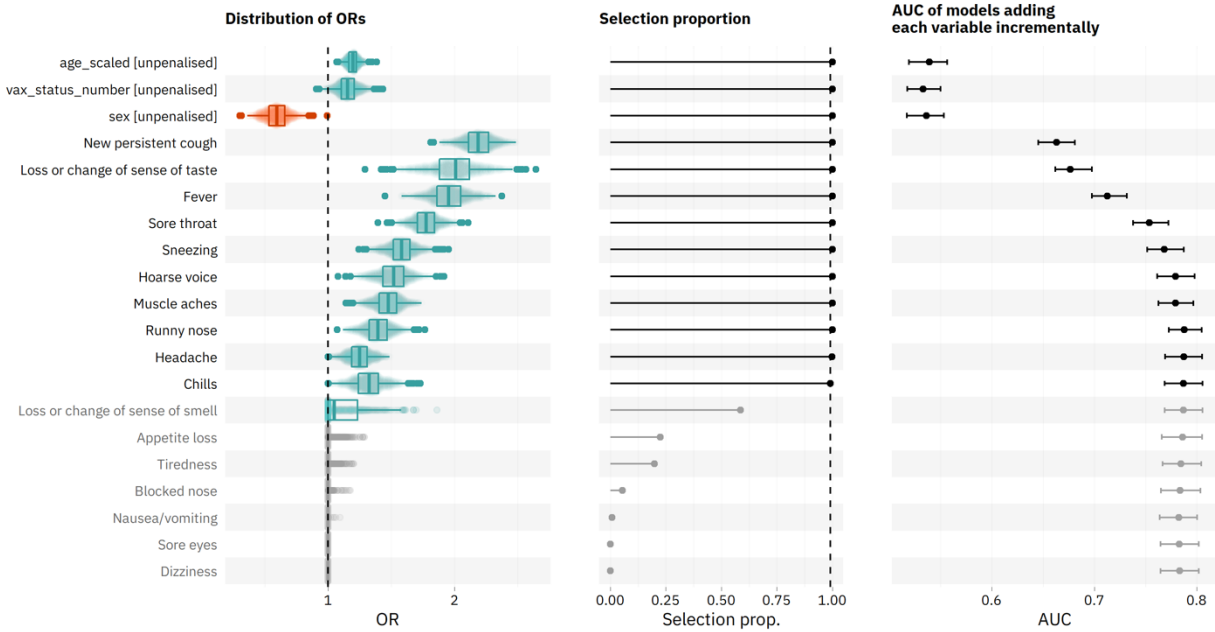

# E Omicron BA.2

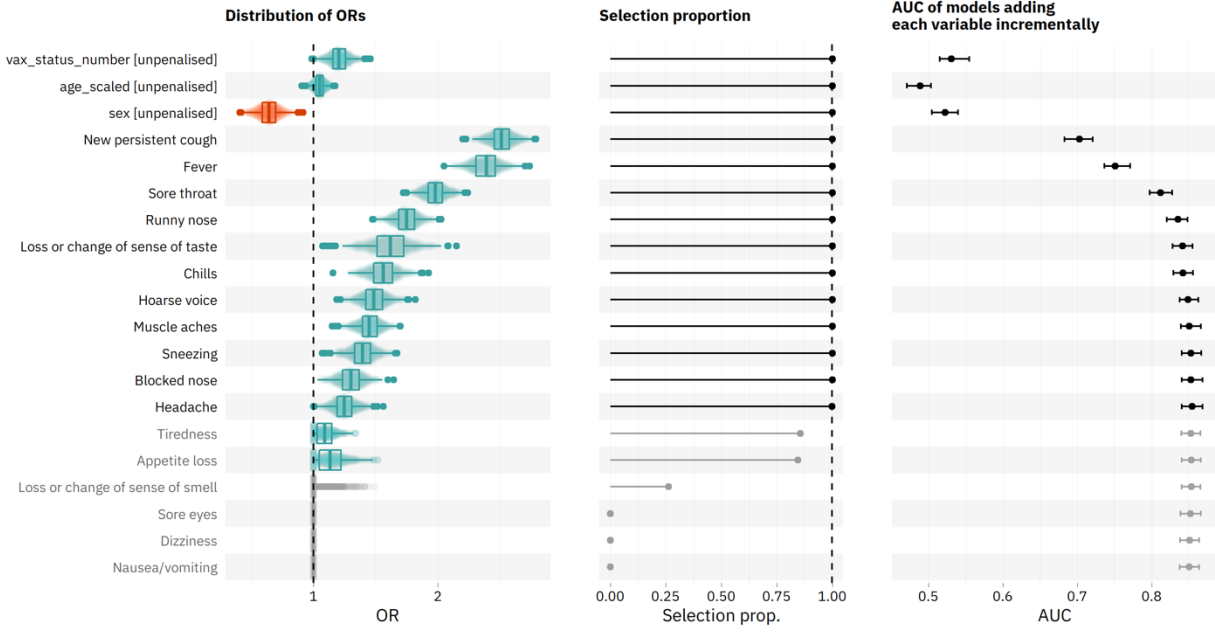



**Supplementary Figure 4** Heatmaps showing co-occurrence of symptoms across variants among swab-positive individuals. Denominators for percentages are the number of swab positive individuals with each variant.

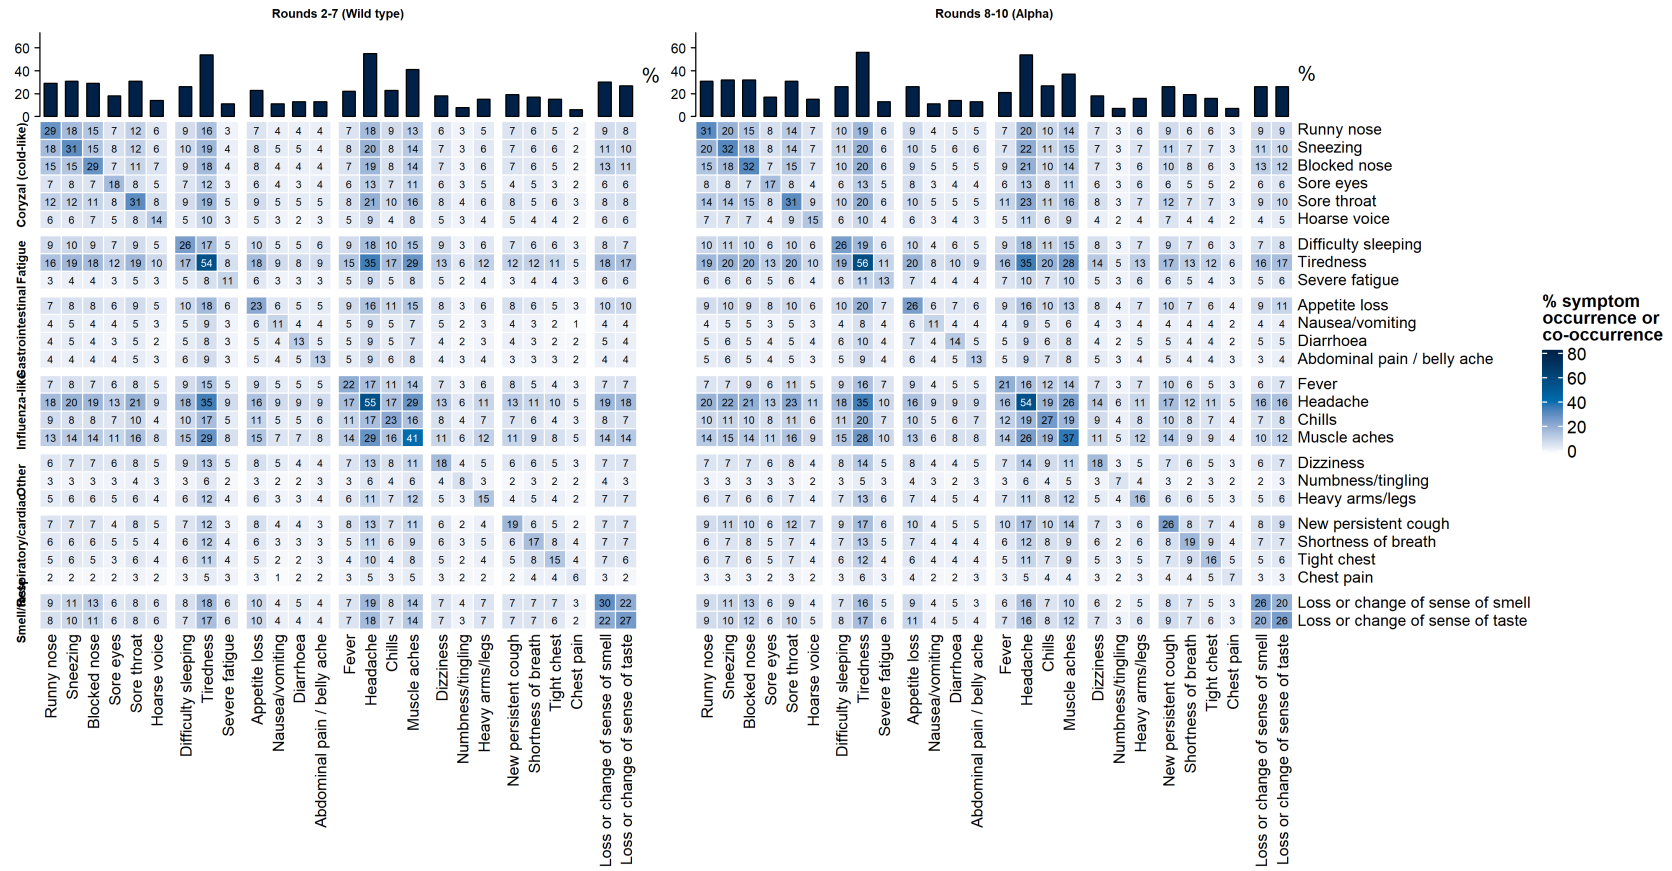

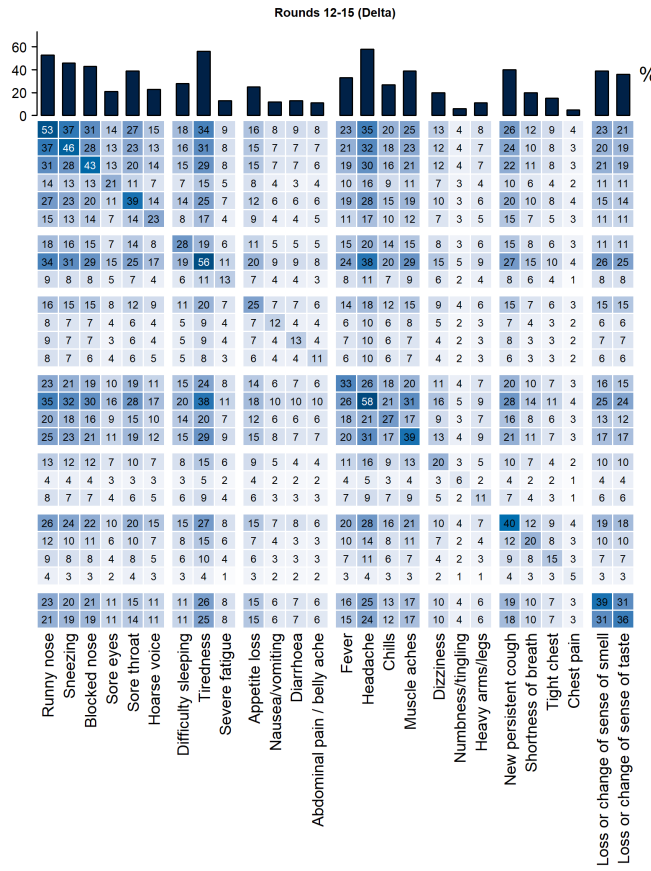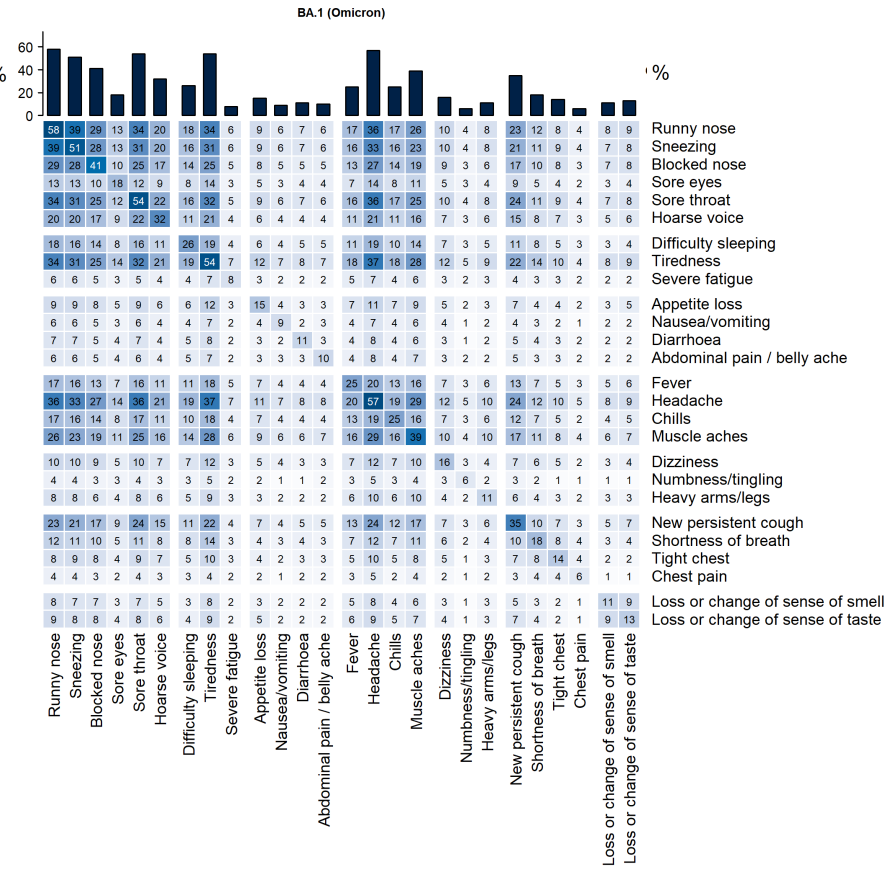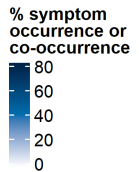

BA.2 (Omicron)

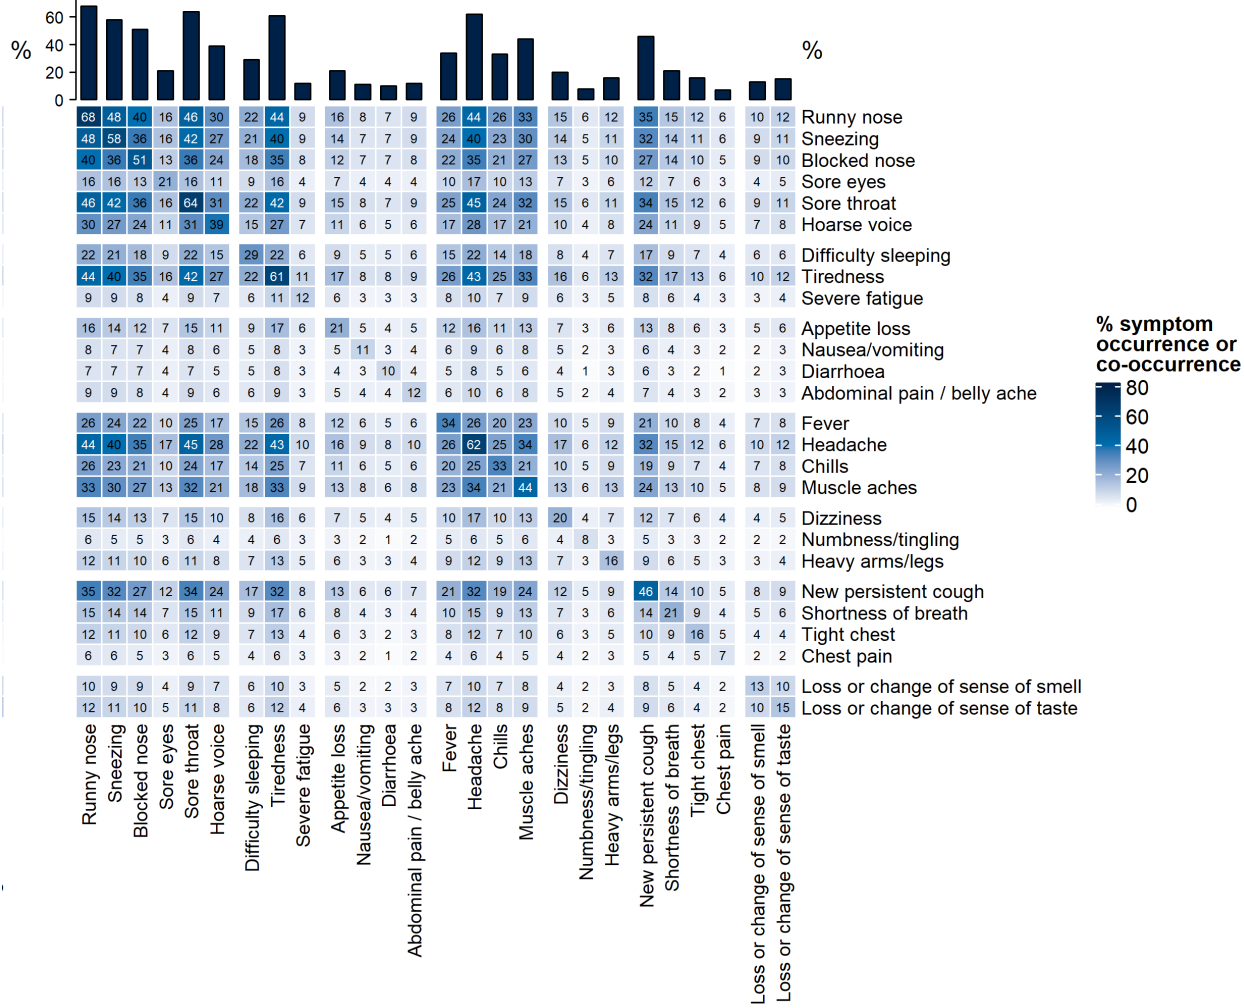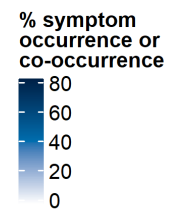

**Supplementary Figure 5** Heatmap showing co-occurrence of first symptoms among swab positive individuals in rounds 17–19 (5 January to 31 March 2022), when Omicron was dominant. The denominator for percentages is the number of swab positive individuals who reported experiencing one or more of 26 symptoms in the week prior to testing in rounds 17–19 (n=7,176). Sore throat, headache, and tiredness are the most common first symptoms and are the most commonly co-occurring pairs of first symptoms.

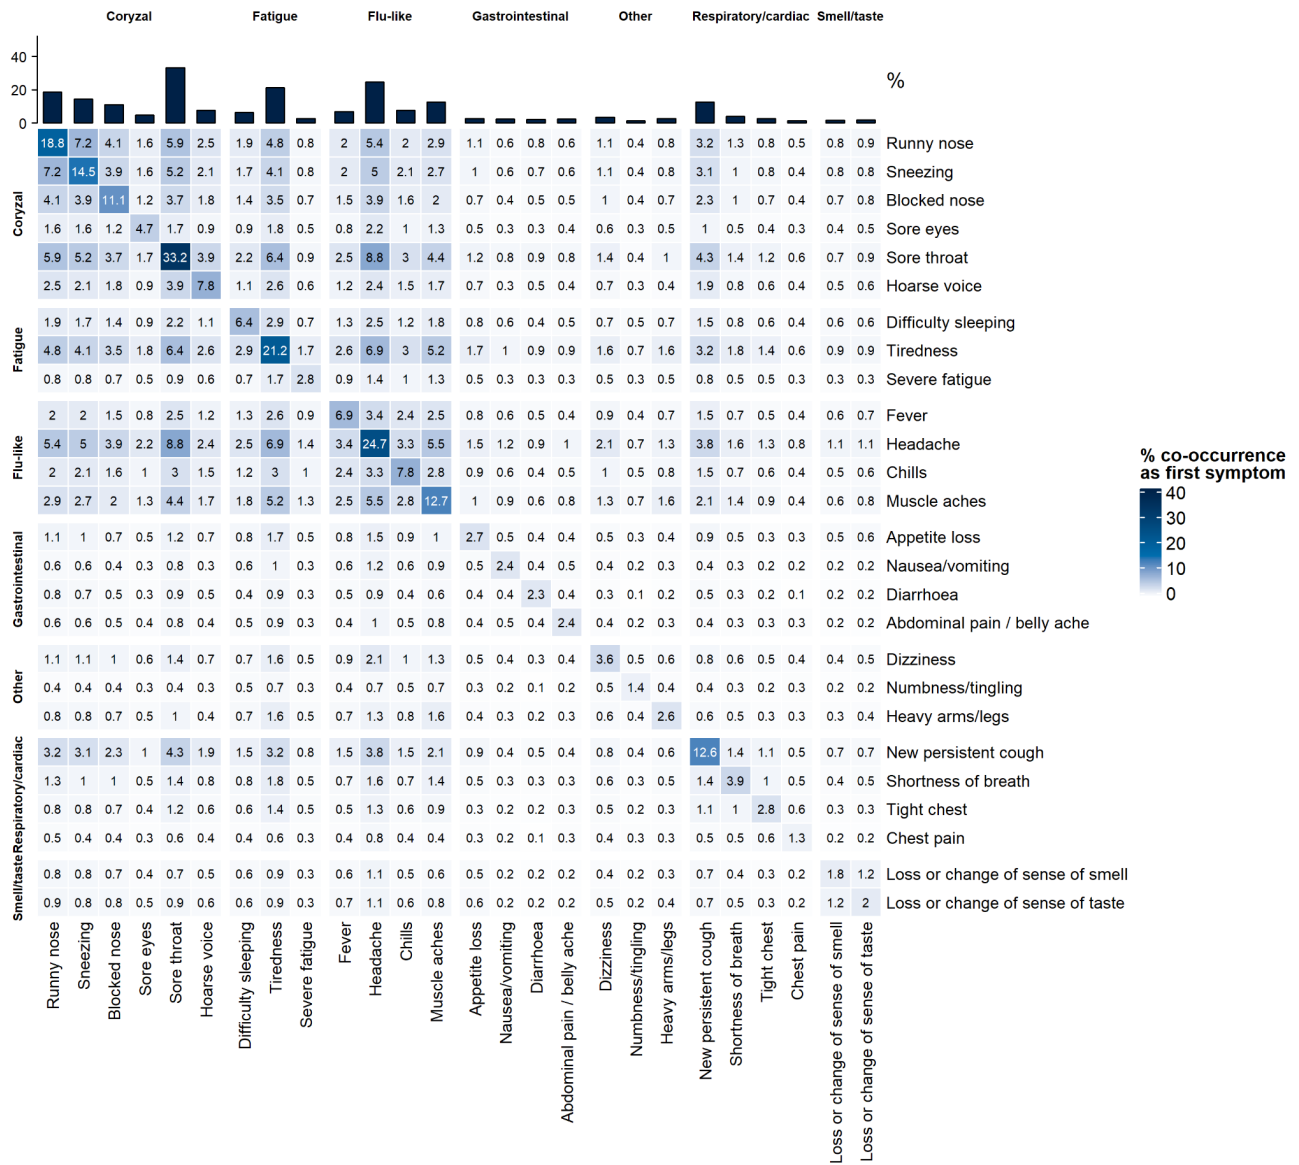

**Supplementary Figure 6** Scatter plot showing N-gene Ct values among symptomatic swab-positive individuals plotted against time (in days) since symptom onset, for BA.1 and BA.2. For each variant, a linear regression model is fitted with Ct value as the dependent variable and days since symptom onset (between 1 and 11 or more). Pearson's R value shown, with a p-value derived from a two-sided test with  $H_0: r=0$ . For both variants there is a positive association between time since symptom onset and Ct value.

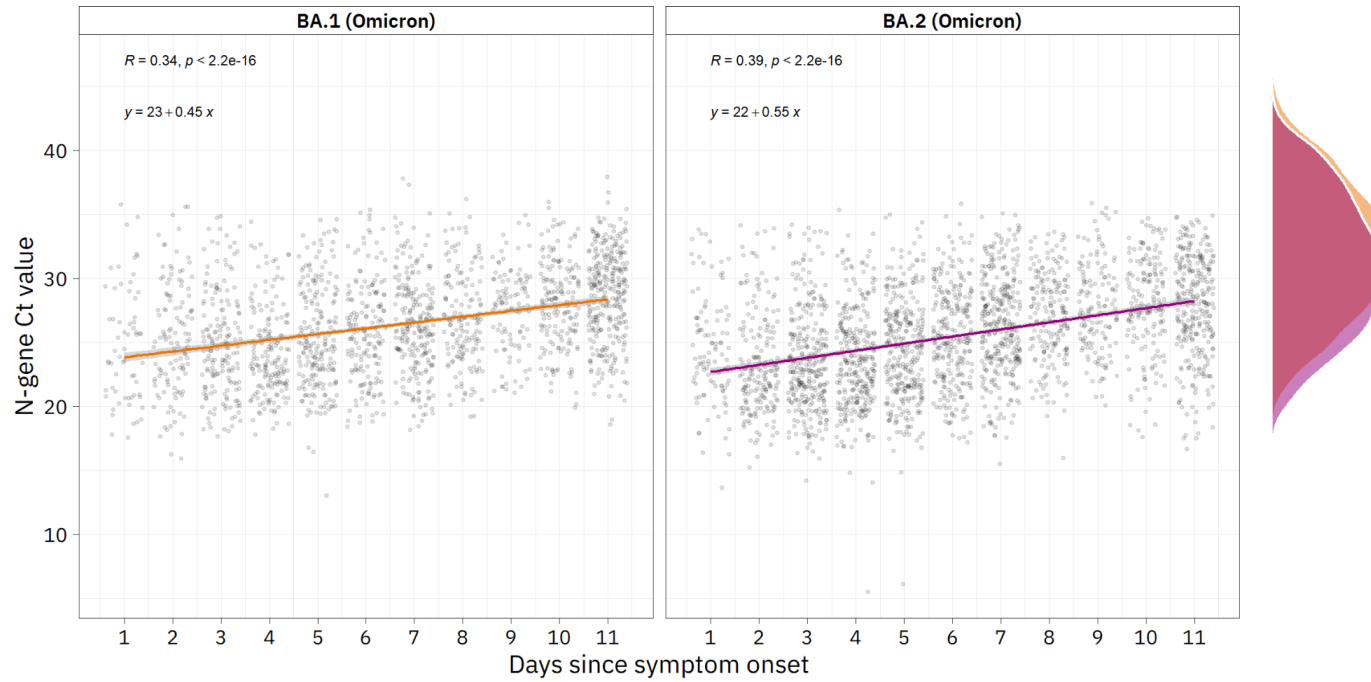

**Supplementary Figure 7** Panel plot showing time since symptom onset across different variant phases. (A) shows the distribution of reported days-since-symptom-onset among N=13,134 PCR positives for the five variants. (B) shows the mean number of symptoms reported at each day after symptom onset, among N=13,134 PCR-positives for each of the five variants, plus 95% confidence intervals. Each variant is shown to have a similar symptom count trajectory, with symptom count peaking between 6 and 9 days after symptom onset. In the Wild-type, Alpha and Delta waves, respondents tended to report symptoms having started longer ago than in the Omicron waves. (C) Presents the univariable analysis shown in Figure 2 among N=1,542,510 participants, additionally adjusted for time since symptom onset (as a categorical variable, 0–4, 5–10, 11+ days). Error bars show 95% confidence intervals. Odds ratios are attenuated but the patterns are largely consistent with the main analysis (Figure 2).

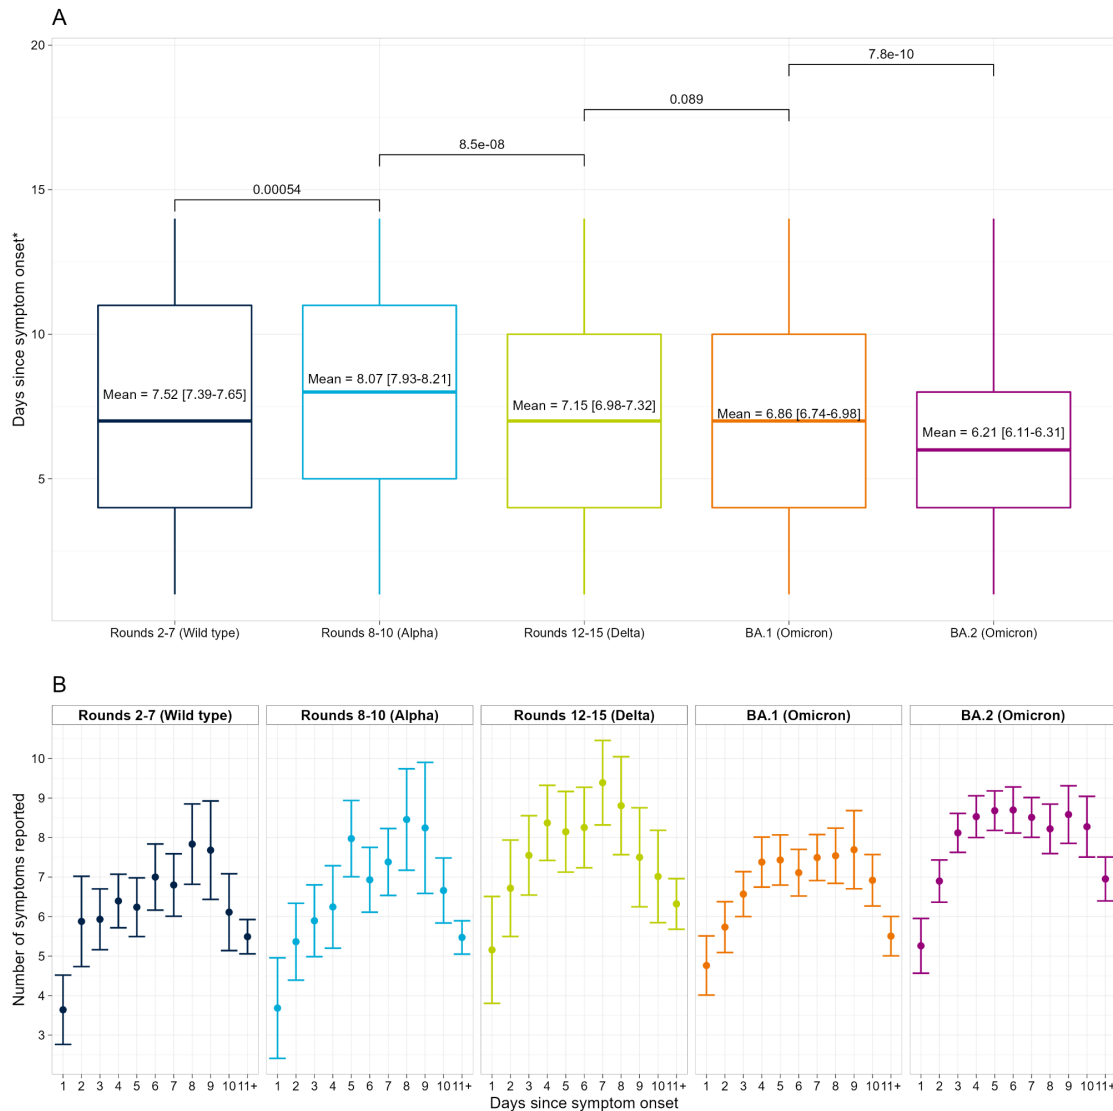

\*Note: for those who reported “11+” days in response to the ‘how long ago did your symptoms start?’ question, we inferred the distribution of symptom durations using the estimates of PCR positivity duration (mean ~14 days) from Kojima *et al* (Kojima, N., Roshani, A. & Klausner, J. D. Duration of COVID-19 PCR positivity for Omicron vs earlier variants. *J. Clin. Virol* 2, 100085 (2022)).

C

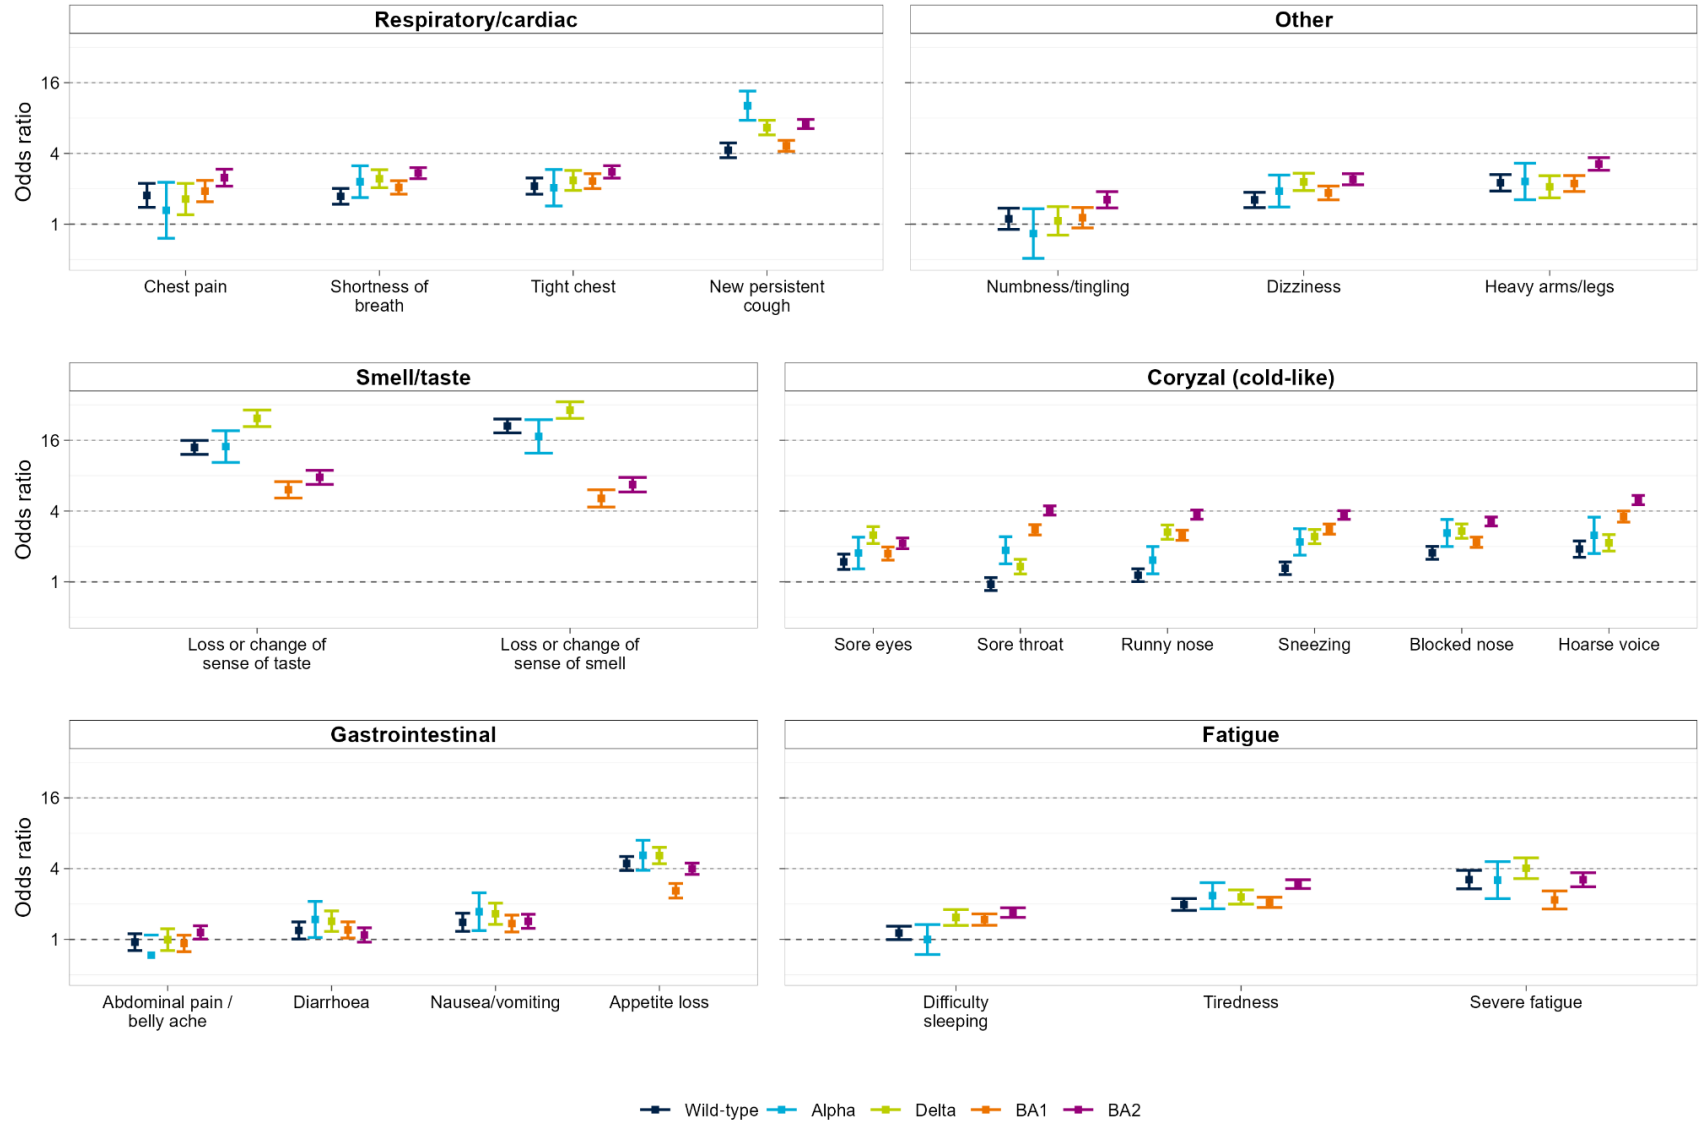

**Figure S8** A) Boxplot showing the distribution of N-gene Ct values by symptom status among PCR positives, including the participants who were excluded from the main analysis owing to missing symptom status ('NA' in the plot). Significance levels are reported for each pairwise comparison, using the Kruskal-Wallis test. Median Ct values are shown within boxplots. Those with unknown symptom status are shown to have lower Ct values than asymptomatics, but higher Ct values than those with 'classic' COVID-19 symptoms (cough, fever, loss or change of smell or taste) or any other symptoms. B) Panel plot showing the distribution of symptom status, including those of unknown status, by round, and in addition the prevalence of PCR positivity, and 95% binomial confidence intervals, by symptom status by round, in N=1,797,914 participants (the study population before exclusions for missing symptom data). Those with unknown symptom status consistently have a PCR positivity rate in between those with COVID-19 symptoms and those with no symptoms. Plots therefore suggest that, as expected, the 'unknown' symptom status group contains a mixture of people with symptoms and without.

A

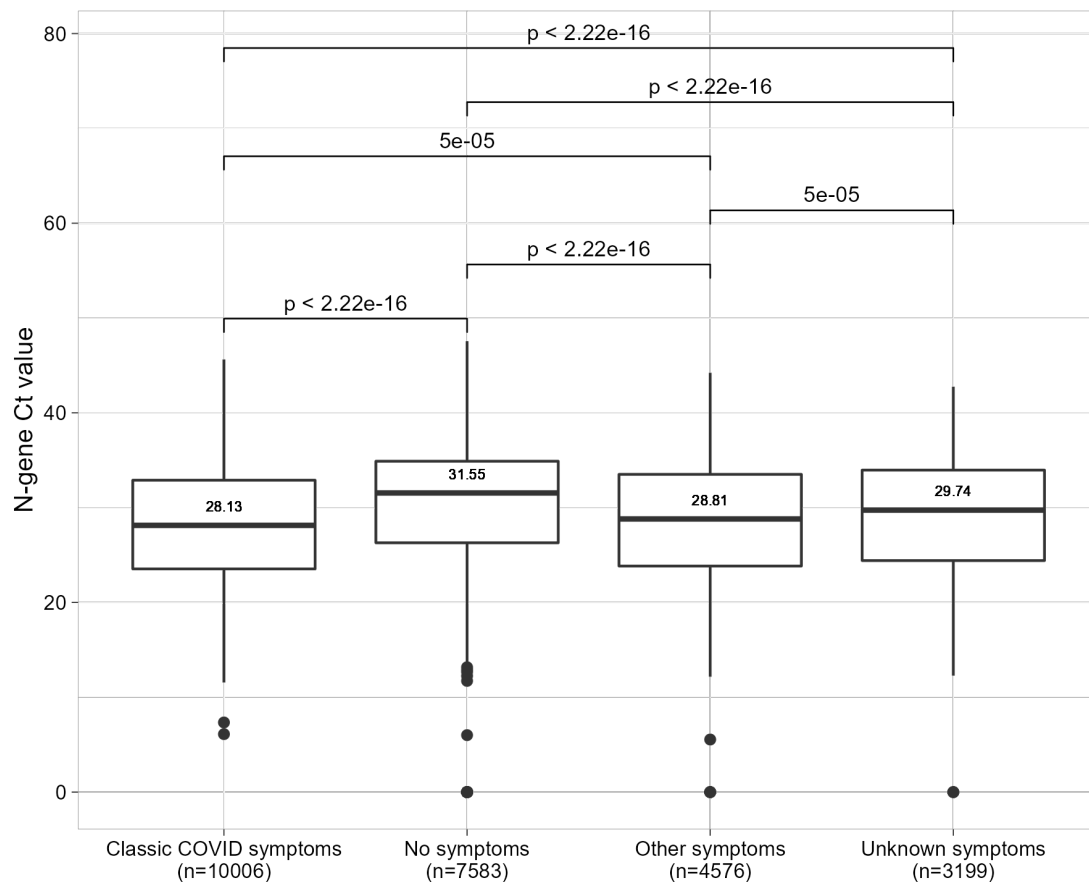



**B**

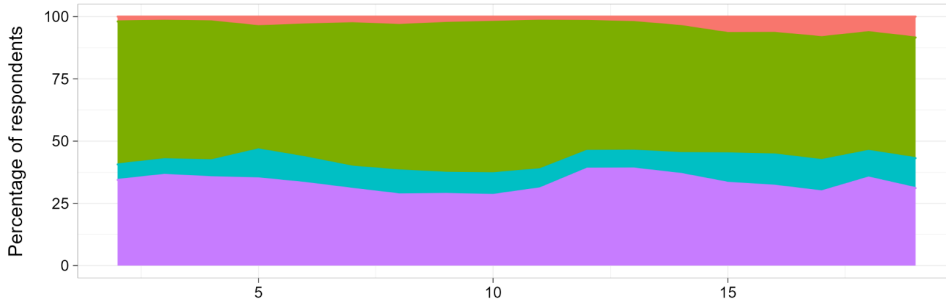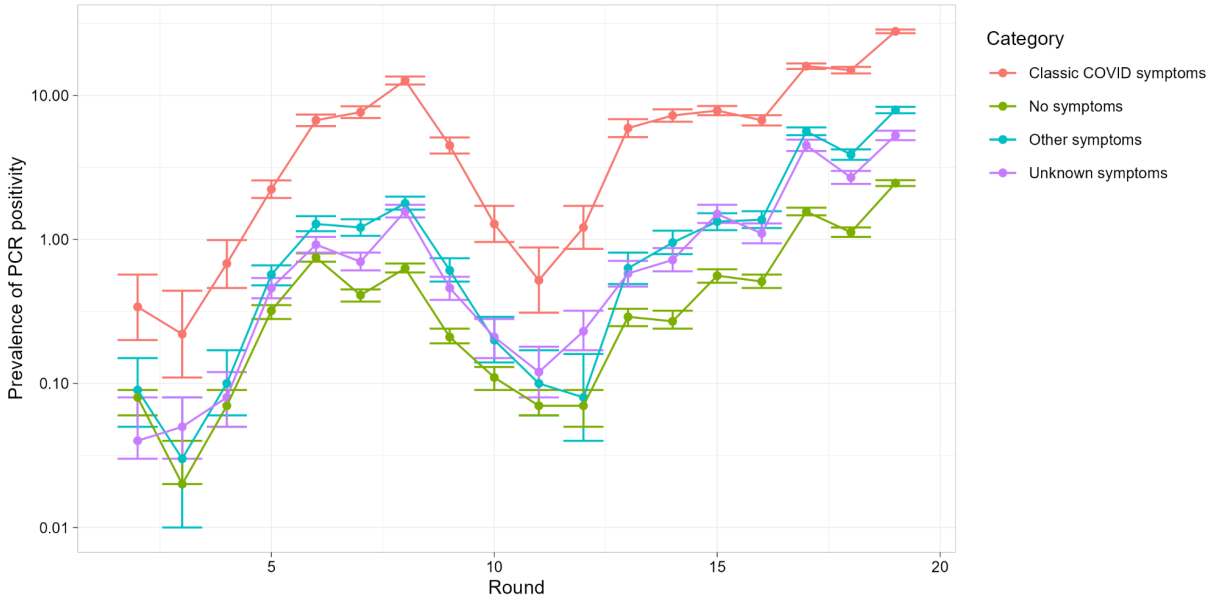

**Figure S9** Prevalence of any of 26 symptoms in N=1,525,062 PCR negative (top) vs N=17,448 PCR positive (bottom) individuals in each round of REACT-1 between June 2020 and March 2022. 95% binomial proportion confidence intervals are shown (owing to large sample size, these are very narrow in PCR negatives). Background symptom prevalence (ie prevalence among PCR negatives) peaks in round 19 (March 2022) at 20.94% [20.66, 21.22], with a low of 9.76% [9.59, 9.94] in round 2 (June 2020).

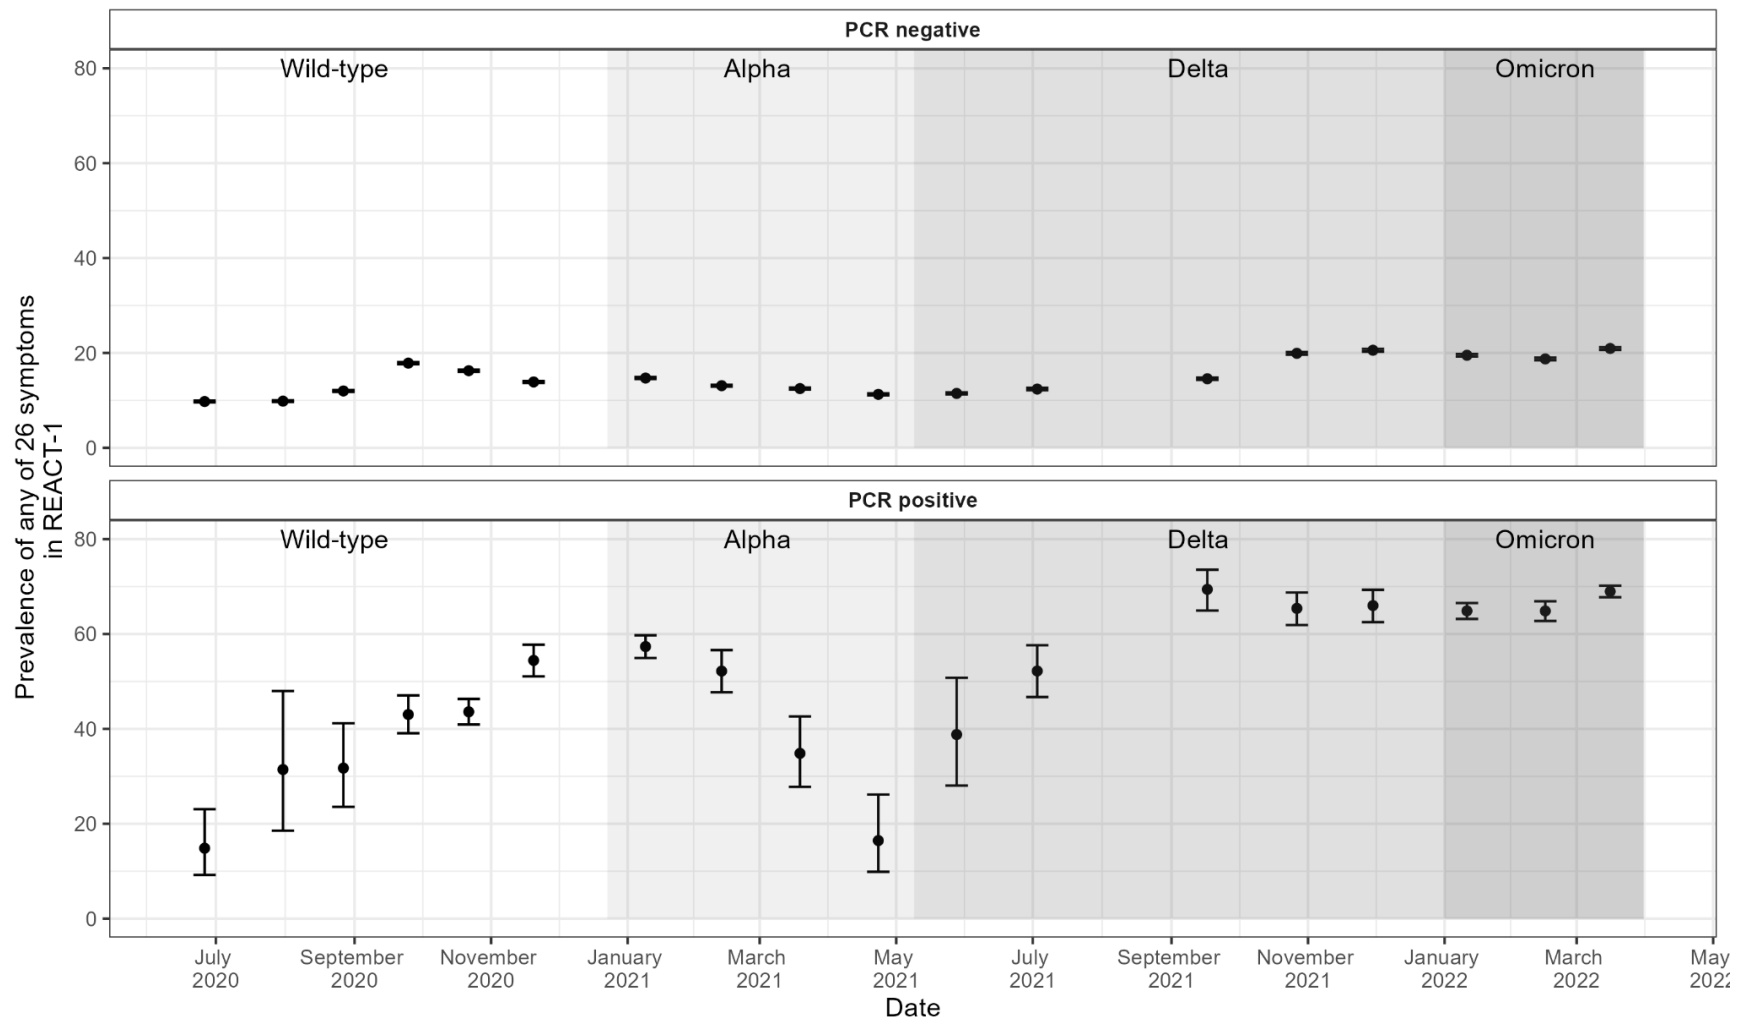

## Supplementary methods

### Survey symptom questions

***In the past 4 weeks, that is since [date inserted], have you physically felt unwell or not quite right?***

1. Yes
2. No

***Have you/has your child had any of the following symptoms in the past 4 weeks, that is since [date inserted]? Please select all the symptoms you have had, whether or not you saw a doctor.***

[select from list of symptoms]

***Which, if any, of these symptoms have you had in the last 7 days, that is since [date inserted]?***

[select from list of symptoms selected in previous question]

***Thinking about the symptoms you had in the last 7 days, that is since [date inserted], which symptom started first?***

[select from list of symptoms selected in previous question]

### Data exclusions

266,847 participants were excluded because of missing symptom data. These participants were people who either skipped the top-level question ‘have you felt unwell in the past month?’ (n=266,361) or said that they had felt unwell but then did not tick any of the specific symptoms later in the survey, or declare ‘none of these’ (486 people). The symptom status of these people was therefore deemed to be unknown and they were removed from the analysis.

## Model specifications

### Unpenalised logistic regression (main analysis, Figure 2, Table S3)

Repeated for each of the 26 symptoms, plus a composite 'any of 26 symptoms' variable, for each of the variants:

$$y \text{ [PCR positive y/n]} \sim \text{covariates [age group, sex, vaccination count]} + \text{symptom [y/n]}$$

### Unpenalised logistic regression (pooled analysis, Figure S2)

For for each of the 26 symptoms, plus a composite 'any of 26 symptoms' variable:

$$y \text{ [PCR positive y/n]} \sim \text{covariates [age group, sex, vaccination count, calendar time]} + \text{symptom} \\ + \text{variant} + \text{symptom [y/n]} * \text{variant}$$

### Unpenalised logistic regression (severity modelling analysis, Table 1)

$$y \text{ [Daily activities affected 'a lot' by symptoms/not]} \sim \text{covariates [Omicron BA.1/BA.2, age} \\ \text{group, sex, vaccination count, Prior} \\ \text{COVID-19, weeks since symptom onset,} \\ \text{calendar time]}^*$$

\*Covariates added incrementally in this order, and Odds Ratios reported for each additionally adjusted model

### Unpenalised log-linear regression with Poisson errors (symptom count modelling analysis, Table S4)

$$y \text{ [Symptom count]} \sim \text{covariates [Omicron BA.1/BA.2, age group, sex, vaccination count, Prior} \\ \text{COVID-19, weeks since symptom onset, calendar time]}^*$$

\*Covariates added incrementally in this order, and Odds Ratios reported for each additionally adjusted model

### Penalised logistic regression (variable selection)

*Repeated for each variant x100 and variable selection proportions calculated:*

$y$  [PCR positive y/n]  $\sim$  *covariates* [age group, sex, vaccination count] + *symptoms* [each of 26 symptoms included as separate binary predictors]

The LASSO model minimises the model error subject to the constraint that the sum of absolute beta coefficients is less than a certain value (calibrated as part of the model fitting process). We imposed an additional constraint that no individual beta on the symptoms can take a value of less than zero.

#### Assessing model performance in variable selection

To quantify the gain in predictive accuracy conferred by each selected symptom, un-penalised logistic models were successively re-fit on 80% subsamples of the holdout data, adding each symptom in order of decreasing selection proportion, and evaluated on the remainder of the holdout data (20%). Age, sex and vaccination status were forced in as predictors in all models. For each set of predictors, the procedure was repeated 100 times with different splits of the holdout data. As in the variable selection, regression coefficients were constrained to non-negativity in the re-fit models.
